# Supplementary material for: Characterization, mechanism and in vivo validation of Helicobacter pylori antagonism by probiotics screened from infants’ feces and oral cavity
Source: Royal Society of Chemistry journal article supplement (doi:10.1039/d3fo04592g), 2023-12-20
Supplement: d3fo04592g1.pdf [file d3fo04592g1.pdf]

## 1 Figures

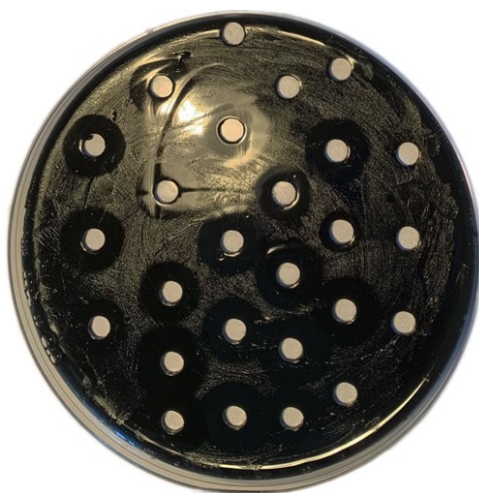

2

3 Fig. S 1 Inhibition pattern of LAB strain against *H. pylori* by agar-well diffusion assay.

4

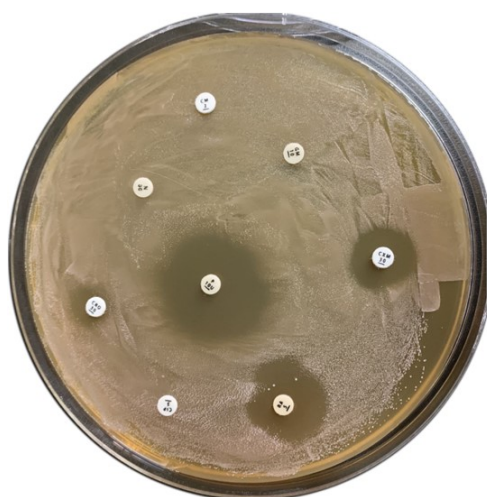

5

6 Fig. S 2 Antibiotic susceptibility pattern of LAB strain by K-B method according to CLSI "Implementation Standard for Antimicrobial Sensitivity Test".

7

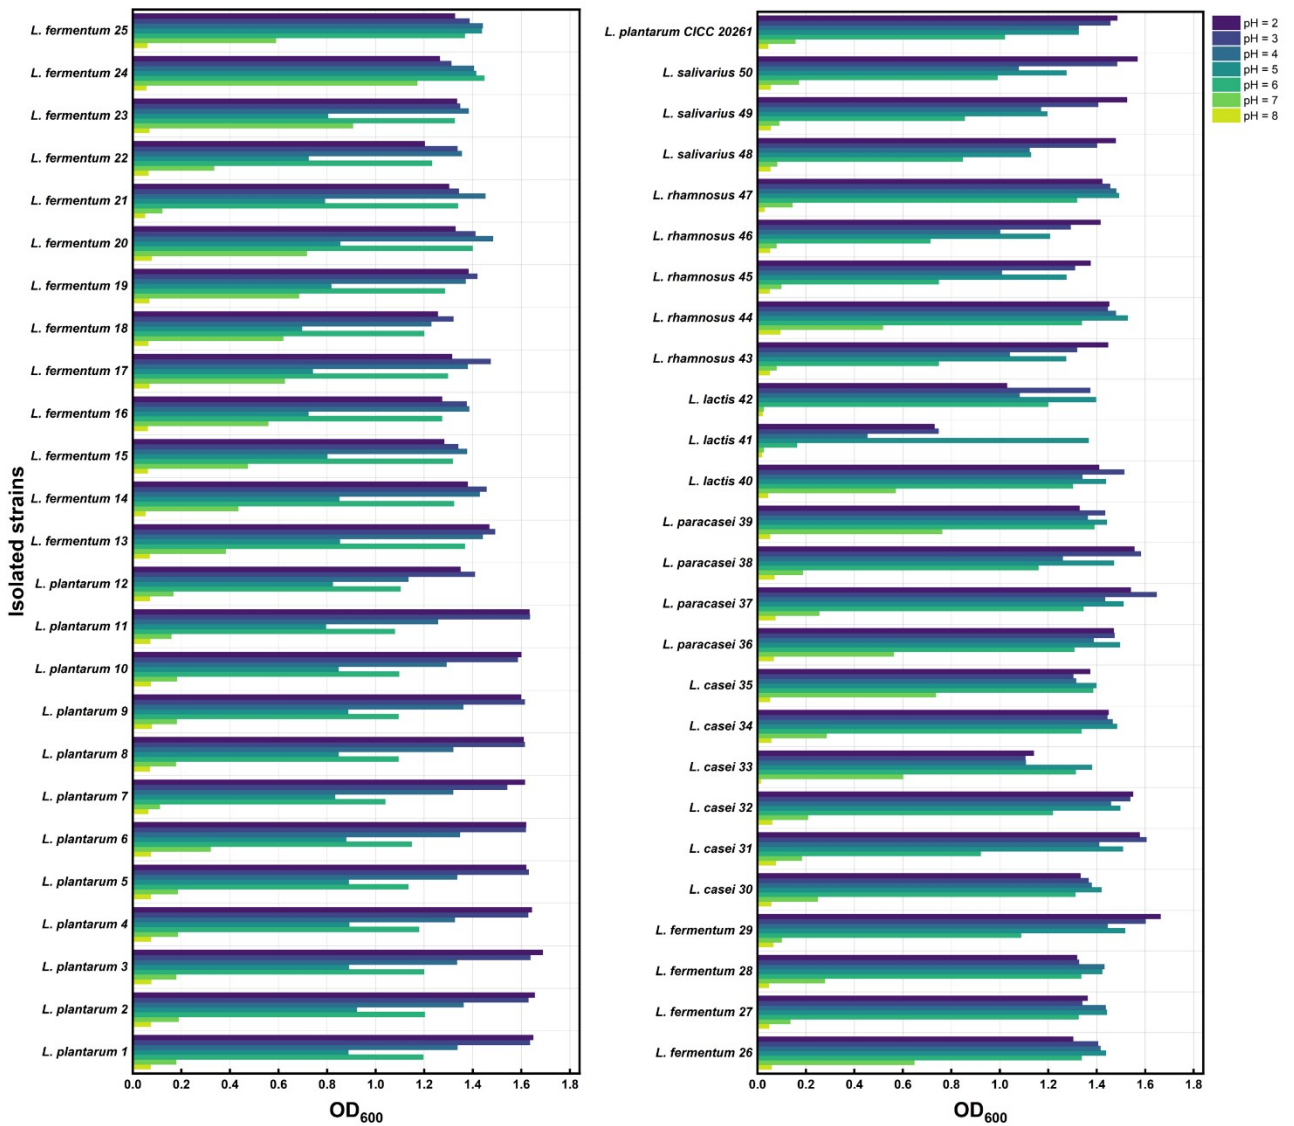

8

9 Fig. S 3 PH tolerance of LAB strains at pH 2-8. PH tolerance of LAB strains was observed by measuring absorbance at 600 nm using a Varioskan LUX microplate

10 reader after incubating LAB in MRS broth at a pH gradient from 2 to 8 which adjusted with NaOH (5.0 M) or HCl (1.0 M) for 24 h at 37°C.

11

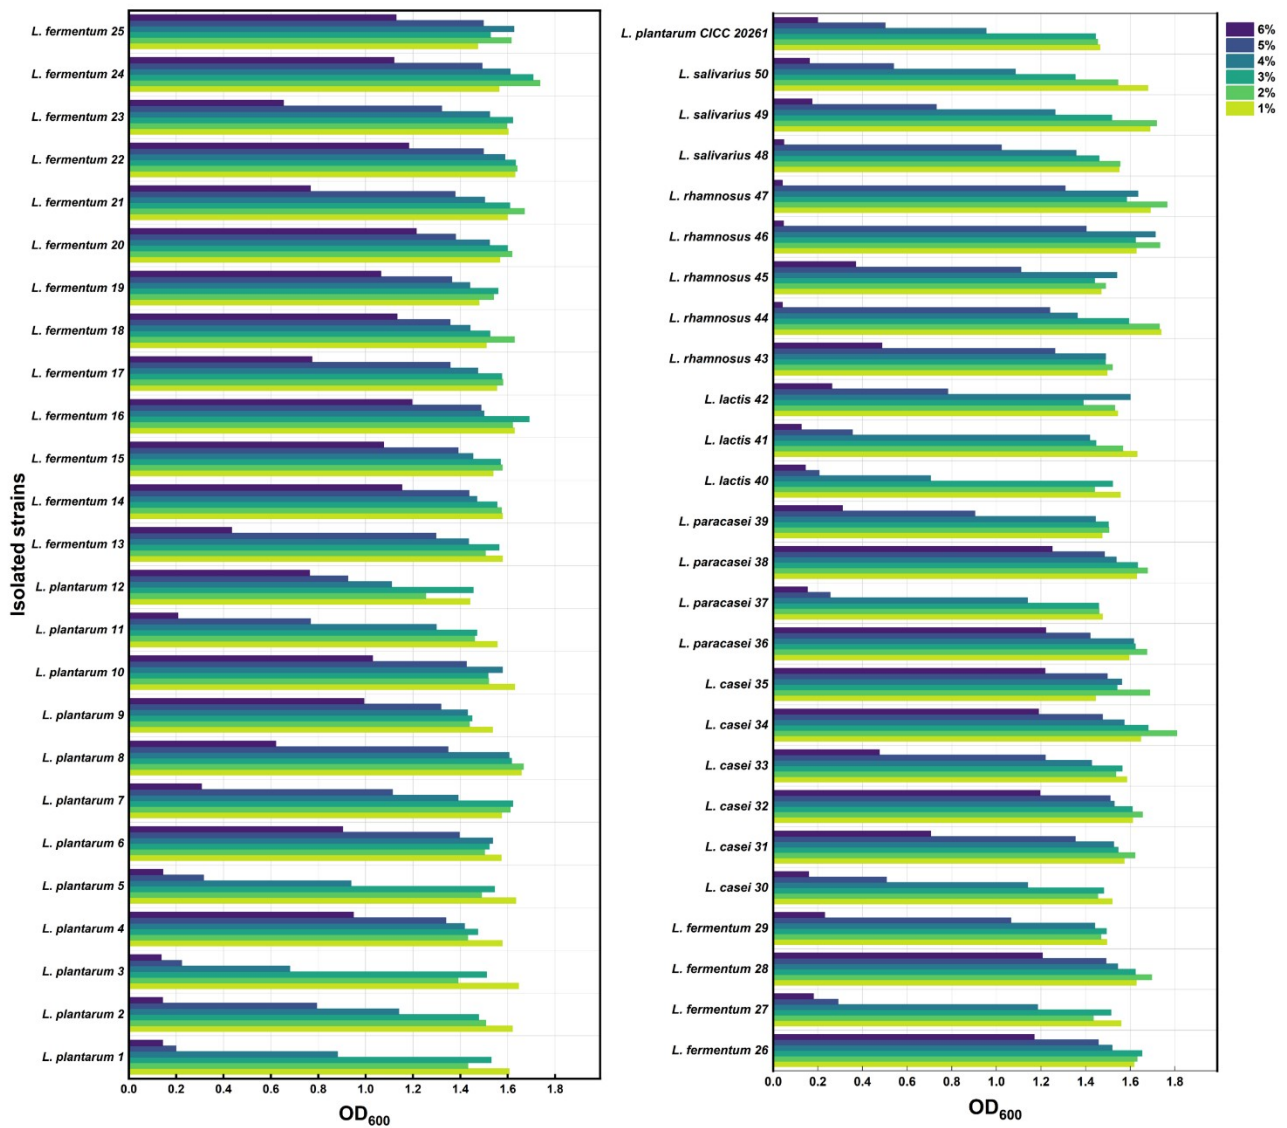

12

13 Fig. S 4 Osmotic tolerance of LAB strains at 1% - 6% (w/v) sodium chloride. Osmotic tolerance of LAB strains was observed by measuring absorbance at 600 nm

14 after incubating LAB in MRS broth at different concentrations of NaCl (1%-6%; w/v) for 24 h at 37°C.

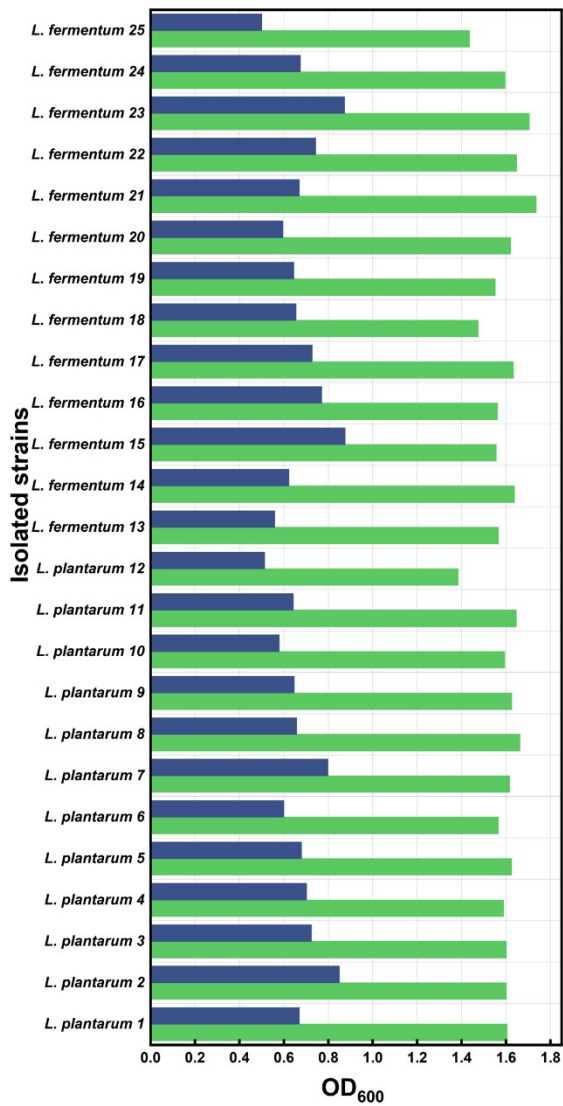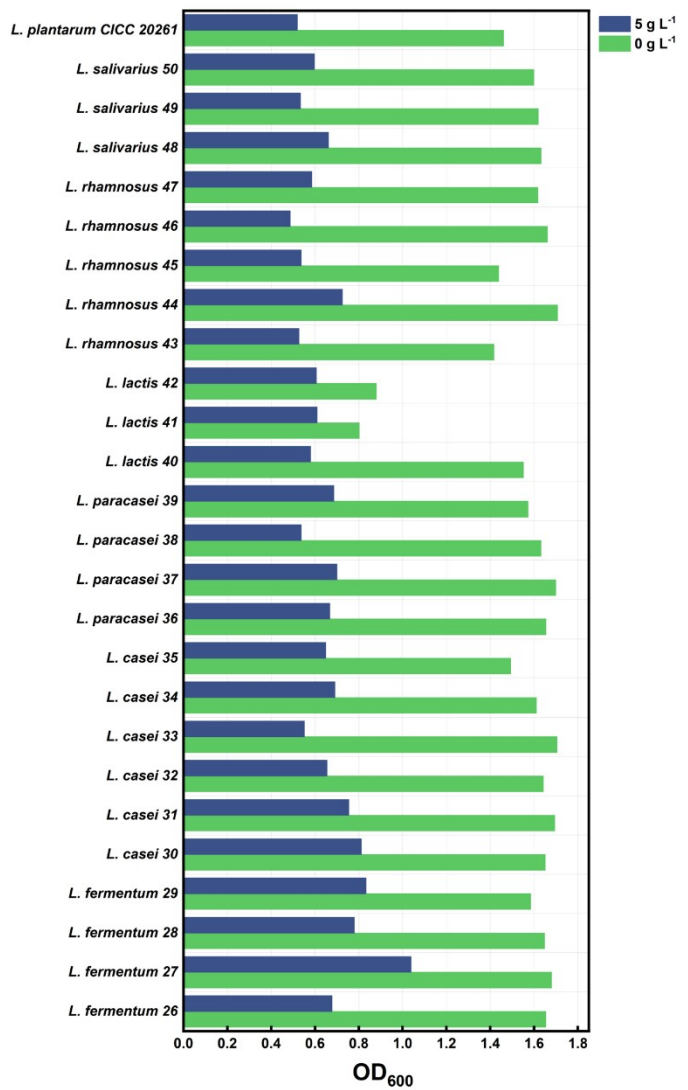

15

16 Fig. S 5 Bile tolerance of LAB strains at 5 g L<sup>-1</sup> bile salts. Bile tolerance of LAB strains was observed by measuring absorbance at 600 nm after incubating LAB in

17 MRS broth supplemented with 5g L<sup>-1</sup> bovine bile salt for 24 h at 37°C.

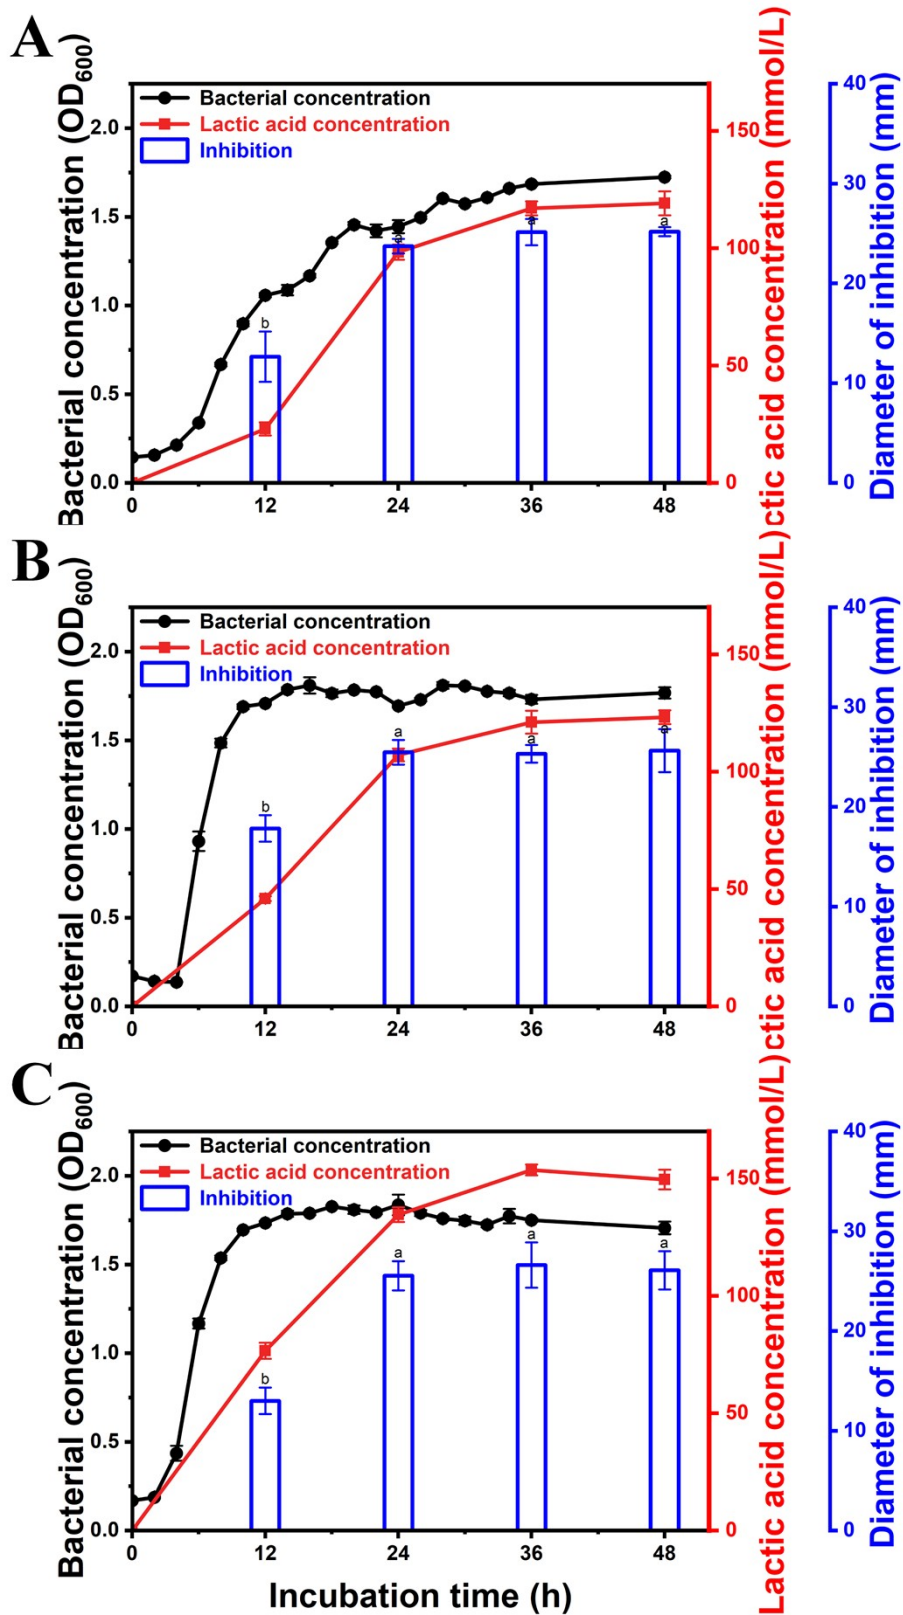

18

19 Fig. S 6 Antibacterial dynamic curves of *L. rhamnosus* NCUH061004 (A), *L. salivarius* NCUH062003 (B) and *L. plantarum* NCUH001003 (C) against *H. pylori*

20 26695. Antibacterial dynamic curves were plotted based on bacterial concentration, lactic concentration, and anti-*H. pylori* activity over a 36-h period.

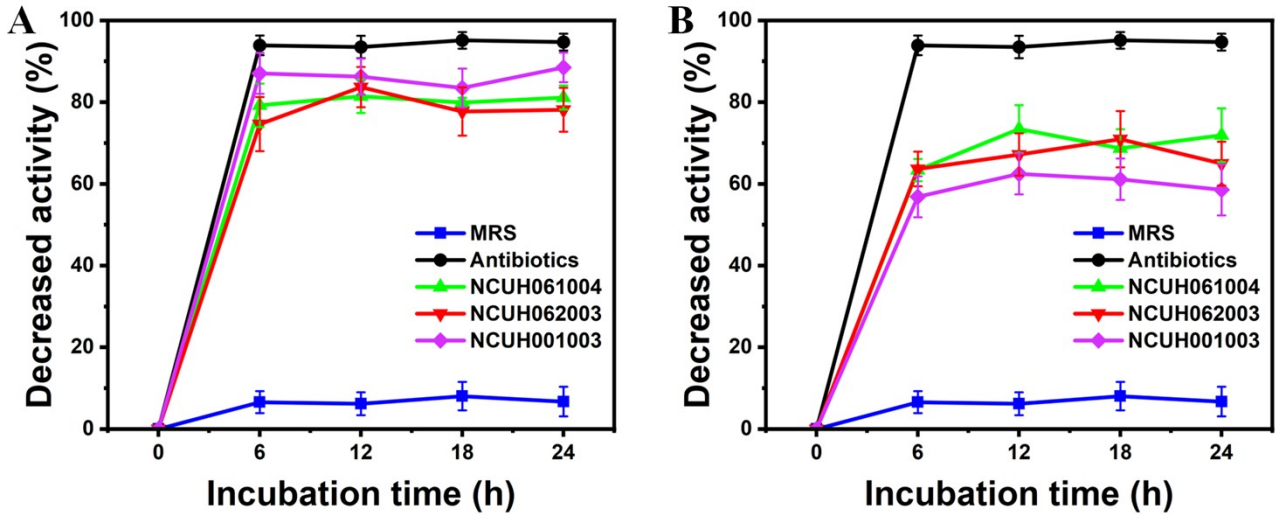

21  
 22 Fig. S 7 The decrease of *H. pylori* urease activity during co-cultivation with supernatants (A) and LAB cells (B). Decreased activity of *H. pylori* urease was analyzed  
 23 using a modified phenol red method.  
 24

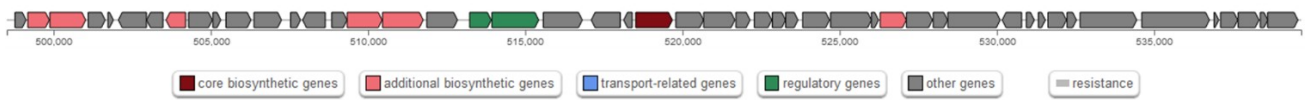

25  
 26 Fig. S 8 The 49 genes of secondary metabolite synthesis gene cluster T3PKS in *L. salivarius* NCUH062003.  
 27

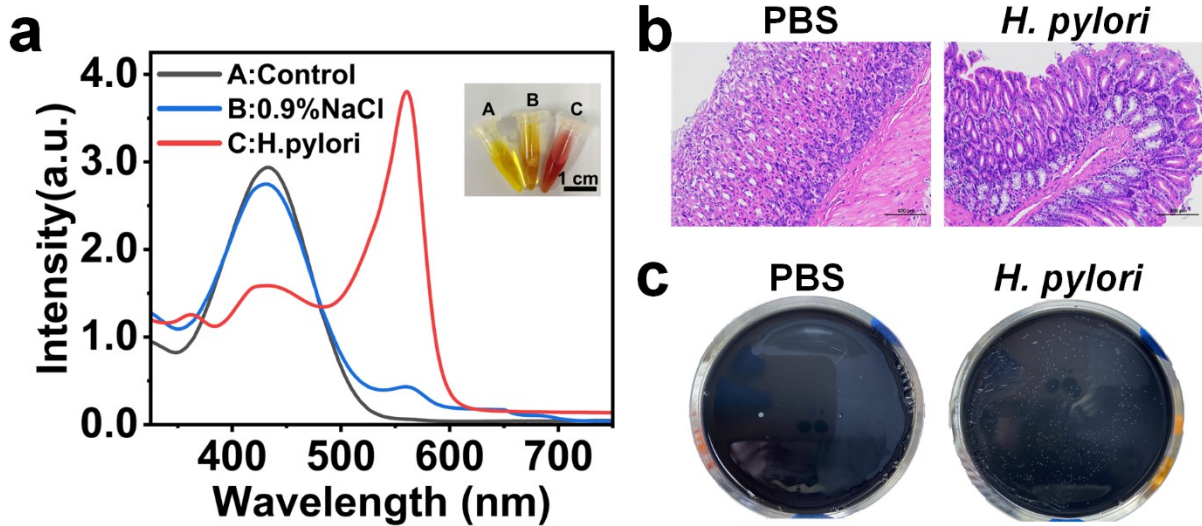

28  
 29 Fig. S 9 Evaluation of *H. pylori* infection in mice by urease assay (a), H&E staining (b) and plate coating (c) of gastric tissues.  
 30  
 31  
 32  
 33  
 34  
 35  
 36

37 **Tables**

38 Table S 1 Bacteria counts and species of colonies in the samples

| Sample <sup>a</sup> | No.  | Bacteria counts <sup>b</sup> | 16S rDNA identification <sup>c</sup>                                                                          |
|---------------------|------|------------------------------|---------------------------------------------------------------------------------------------------------------|
| Infant feces        | IF1  | 8.90 ± 0.09                  | <i>Lactiplantibacillus plantarum</i> , <i>Lacticaseibacillus rhamnosus</i>                                    |
|                     | IF2  | 8.25 ± 0.24                  | <i>Lactiplantibacillus plantarum</i>                                                                          |
|                     | IF3  | 8.30 ± 0.24                  | <i>Lactiplantibacillus plantarum</i> , <i>Limosilactobacillus fermentum</i> , <i>Lacticaseibacillus casei</i> |
|                     | IF4  | 8.40 ± 0.24                  | <i>Lactiplantibacillus plantarum</i>                                                                          |
|                     | IF5  | 7.65 ± 0.30                  | <i>Limosilactobacillus fermentum</i>                                                                          |
|                     | IF6  | 7.15 ± 0.19                  | <i>Limosilactobacillus fermentum</i>                                                                          |
|                     | IF7  | 7.20 ± 0.32                  | <i>Limosilactobacillus fermentum</i>                                                                          |
|                     | IF8  | 7.60 ± 0.27                  | <i>Lacticaseibacillus casei</i> , <i>Lactobacillus mucosae</i>                                                |
|                     | IF9  | 7.60 ± 0.55                  | <i>Lacticaseibacillus casei</i> , <i>Lacticaseibacillus paracasei</i>                                         |
|                     | IF10 | 8.30 ± 0.23                  | <i>Lactococcus lactis</i>                                                                                     |
|                     | IF11 | 8.55 ± 0.32                  | <i>Lacticaseibacillus rhamnosus</i>                                                                           |
|                     | IF12 | 7.43 ± 0.36                  | <i>Lacticaseibacillus casei</i>                                                                               |
| Infant saliva       | IS1  | 6.45 ± 0.53                  | <i>Limosilactobacillus fermentum</i>                                                                          |
|                     | IS2  | 7.25 ± 0.39                  | <i>Limosilactobacillus fermentum</i> , <i>Ligilactobacillus salivarius</i>                                    |
|                     | IS3  | 6.90 ± 0.67                  | <i>Lactococcus lactis</i>                                                                                     |
|                     | IS4  | 7.20 ± 0.49                  | <i>Lactococcus lactis</i>                                                                                     |
|                     | IS5  | 6.35 ± 0.61                  | <i>Ligilactobacillus salivarius</i>                                                                           |
|                     | IS6  | 7.09 ± 0.61                  | <i>Limosilactobacillus fermentum</i>                                                                          |
|                     | IS7  | 6.78 ± 0.73                  | <i>Limosilactobacillus fermentum</i> , <i>Ligilactobacillus salivarius</i>                                    |
|                     | IS8  | 6.29 ± 0.58                  | <i>Limosilactobacillus fermentum</i> , <i>Lactiplantibacillus plantarum</i>                                   |
|                     | IS9  | 6.53 ± 0.33                  | <i>Limosilactobacillus fermentum</i>                                                                          |
|                     | IS10 | 6.98 ± 0.13                  | <i>Ligilactobacillus salivarius</i> , <i>Lactiplantibacillus plantarum</i>                                    |
|                     | IS11 | 6.43 ± 0.63                  | <i>Limosilactobacillus fermentum</i>                                                                          |
|                     | IS12 | 7.15 ± 0.39                  | <i>Limosilactobacillus fermentum</i>                                                                          |

39 <sup>a</sup> Feces and saliva samples were collected from healthy infants aged 0-24 months in Nanchang area. <sup>b</sup> LAB colonies were obtained through Microbial  
40 Colony Picker (QPix 420), and bacteria counts were calculated by plate colony counting method. <sup>c</sup> 16S rDNA identification of the strain was obtained by  
41 homology matching in NCBI nucleotide database using BLAST analysis tools. Results are expressed as mean of triplicate values ± standard deviation.  
42

43 Table S 2 Morphology, biochemistry and 16S rDNA identification of LAB strains from infant feces and the oral cavity<sup>a</sup>

| No. | Morphology                                                 | Structure under the microscope                 | Gram staining | Catalase test | 16S rDNA identification |
|-----|------------------------------------------------------------|------------------------------------------------|---------------|---------------|-------------------------|
| 1   | 3.5 mm, round, milky white, shiny glossy, convex, smooth   | Short, rod shaped, biclavate                   | +ve           | -ve           | <i>L. plantarum</i>     |
| 2   | 2.5mm, round, milky white, glossy, convex, smooth          | Short, rod shaped, biclavate                   | +ve           | -ve           | <i>L. plantarum</i>     |
| 3   | 2.5mm, round, off-white, dim, convex, smooth               | Short, rod shaped, biclavate                   | +ve           | -ve           | <i>L. plantarum</i>     |
| 4   | 3.8 mm, round, milk white, shiny glossy, convex, smooth    | Short, rod shaped, biclavate                   | +ve           | -ve           | <i>L. plantarum</i>     |
| 5   | 2.6 mm, round, milky white, shiny glossy, convex, smooth   | Short, rod shaped, biclavate                   | +ve           | -ve           | <i>L. plantarum</i>     |
| 6   | 3.2 mm, round, milky white, shiny glossy, convex, smooth   | Short, rod shaped, biclavate                   | +ve           | -ve           | <i>L. plantarum</i>     |
| 7   | 3.4 mm, round, milky white, shiny glossy, swelling, smooth | Short, rod shaped, biclavate                   | +ve           | -ve           | <i>L. plantarum</i>     |
| 8   | 2.8mm, round, milky white, shiny glossy, convex, smooth    | Short, rod shaped, biclavate                   | +ve           | -ve           | <i>L. plantarum</i>     |
| 9   | 2.5mm, round, milky white, glossy, convex, smooth          | Long, rod shaped, biclavate                    | +ve           | -ve           | <i>L. plantarum</i>     |
| 10  | 2.6mm, round, off-white, dim, convex, smooth               | Long, rod shaped, biclavate                    | +ve           | -ve           | <i>L. plantarum</i>     |
| 11  | 2.5mm, round, milky white, shiny glossy, convex, smooth    | Long, rod shaped, biclavate                    | +ve           | -ve           | <i>L. plantarum</i>     |
| 12  | 1.2 mm, round, milky white, shiny glossy, convex, smooth   | Long, rod shaped, biclavate                    | +ve           | -ve           | <i>L. fermentum</i>     |
| 13  | 0.7mm, irregular, white, dim, flat, rough                  | Short, rod shaped, biclavate, partially curved | +ve           | -ve           | <i>L. fermentum</i>     |
| 14  | 0.8mm, irregular, white, dim, flat, rough                  | Short, rod shaped, biclavate, partially curved | +ve           | -ve           | <i>L. fermentum</i>     |

|    |                                                        |                                                |     |     |                      |
|----|--------------------------------------------------------|------------------------------------------------|-----|-----|----------------------|
| 15 | 0.7mm, irregular, white, dim, flat, rough              | Short, rod shaped, biclavate, partially curved | +ve | -ve | <i>L. fermentum</i>  |
| 16 | 0.8mm, irregular, white, dim, flat, rough              | Short, rod shaped, biclavate, partially curved | +ve | -ve | <i>L. fermentum</i>  |
| 17 | 1.0mm, round, white, glossy, flat, rough               | Short, rod shaped, biclavate, partially curved | +ve | -ve | <i>L. fermentum</i>  |
| 18 | 1.2mm, round, white, glossy, flat, rough               | Short, rod shaped, biclavate, partially curved | +ve | -ve | <i>L. fermentum</i>  |
| 19 | 1.0mm, round, white, glossy, flat, rough               | Short, rod shaped, biclavate, partially curved | +ve | -ve | <i>L. fermentum</i>  |
| 20 | 0.5mm, round, off-white, translucent, convex, smooth   | Short, rod shaped, biclavate, partially curved | +ve | -ve | <i>L. fermentum</i>  |
| 21 | 0.5mm, round, off-white, translucent, convex, smooth   | Short, rod shaped, biclavate, partially curved | +ve | -ve | <i>L. fermentum</i>  |
| 22 | 0.6mm, round, off-white, translucent, convex, smooth   | Short, rod shaped, biclavate, partially curved | +ve | -ve | <i>L. fermentum</i>  |
| 23 | 0.6mm, round, off-white, translucent, convex, smooth   | Short, rod shaped, biclavate, partially curved | +ve | -ve | <i>L. fermentum</i>  |
| 24 | 0.8mm, irregular, white, dim, flat, smooth             | Short, rod shaped, biclavate, partially curved | +ve | -ve | <i>L. fermentum</i>  |
| 25 | 0.9mm, irregular, white, dim, flat, smooth             | Short, rod shaped, biclavate, partially curved | +ve | -ve | <i>L. fermentum</i>  |
| 26 | 1.2mm, irregular, off-white, dim, flat, smooth         | Short, rod shaped, biclavate, partially curved | +ve | -ve | <i>L. fermentum</i>  |
| 27 | 1.0mm, irregular, white, dim, flat, smooth             | Short, rod shaped, biclavate, partially curved | +ve | -ve | <i>L. fermentum</i>  |
| 28 | 0.8mm, irregular, off-white, translucent, flat, smooth | Short, rod shaped, biclavate, partially curved | +ve | -ve | <i>L. fermentum</i>  |
| 29 | 0.8mm, irregular, white, dim, flat, smooth             | Short, rod shaped, biclavate, partially curved | +ve | -ve | <i>L. fermentum</i>  |
| 30 | 0.5mm, round, off-white, dim, convex, rough            | Short, rod shaped, biclavate                   | +ve | -ve | <i>L. casei</i>      |
| 31 | 0.4mm, round, off-white, dim, convex, rough            | Short, rod shaped, biclavate                   | +ve | -ve | <i>L. casei</i>      |
| 32 | 0.4mm, round, off-white, dim, convex, rough            | Short, rod shaped, biclavate                   | +ve | -ve | <i>L. casei</i>      |
| 33 | 0.5mm, irregular, off-white, dim, convex, rough        | Short, rod shaped, biclavate                   | +ve | -ve | <i>L. casei</i>      |
| 34 | 0.5mm, irregular, off-white, dim, convex, rough        | Short, rod shaped, biclavate                   | +ve | -ve | <i>L. casei</i>      |
| 35 | 0.3mm, round, off-white, dim, convex, rough            | Short, rod shaped, biclavate                   | +ve | -ve | <i>L. casei</i>      |
| 36 | 0.5mm, round, off-white, dim, convex, rough            | Short, rod shaped, biclavate                   | +ve | -ve | <i>L. paracasei</i>  |
| 37 | 0.3mm, round, off-white, dim, convex, rough            | Short, rod shaped, biclavate                   | +ve | -ve | <i>L. paracasei</i>  |
| 38 | 0.3mm, round, off-white, dim, convex, rough            | Short, rod shaped, biclavate                   | +ve | -ve | <i>L. paracasei</i>  |
| 39 | 0.5mm, round, off-white, dim, convex, rough            | Short, rod shaped, biclavate                   | +ve | -ve | <i>L. paracasei</i>  |
| 40 | 1.0mm, round, off-white, glossy, flat, smooth          | Sphere, short chain-typed                      | +ve | -ve | <i>Lc. lactis</i>    |
| 41 | 0.6mm, round, off-white, glossy, flat, smooth          | Sphere, short chain-typed                      | +ve | -ve | <i>Lc. lactis</i>    |
| 42 | 0.5mm, round, off-white, glossy, flat, smooth          | Sphere, short chain-typed                      | +ve | -ve | <i>Lc. lactis</i>    |
| 43 | 2 mm, round, white, glossy, convex, rough              | Short, rod shaped, biclavate                   | +ve | -ve | <i>L. rhamnosus</i>  |
| 44 | 2 mm, round, white, glossy, convex, rough              | Short, rod shaped, biclavate                   | +ve | -ve | <i>L. rhamnosus</i>  |
| 45 | 2 mm, round, white, glossy, convex, rough              | Short, rod shaped, biclavate                   | +ve | -ve | <i>L. rhamnosus</i>  |
| 46 | 2.5mm, round, white, glossy, convex, rough             | Short, rod shaped, biclavate                   | +ve | -ve | <i>L. rhamnosus</i>  |
| 47 | 2.5 mm, round, white, glossy, convex, rough            | Short, rod shaped, biclavate                   | +ve | -ve | <i>L. rhamnosus</i>  |
| 48 | 2.5 mm, round, white, glossy, flat, smooth             | Short, rod shaped, biclavate                   | +ve | -ve | <i>L. salivarius</i> |
| 49 | 3.0 mm, round, white, glossy, flat, smooth             | Short, rod shaped, biclavate                   | +ve | -ve | <i>L. salivarius</i> |
| 50 | 3.0 mm, round, milky white, glossy, flat, smooth       | Short, rod shaped, biclavate                   | +ve | -ve | <i>L. salivarius</i> |

44 <sup>a</sup> LAB were identified by morphological observation, gram staining, catalase test and 16S rDNA identification.

45

46 Table S 3 Transit tolerance, urease inhibition rate and cell surface hydrophobicity of LAB strains

| Strain                | Transit tolerance <sup>a</sup> (%) | Urease inhibition rate <sup>b</sup> (%) | Cell surface hydrophobicity <sup>c</sup> (%) |
|-----------------------|------------------------------------|-----------------------------------------|----------------------------------------------|
| <i>L. plantarum</i> 1 | 10.84 ± 0.33 <sup>f</sup>          | 80.22 ± 0.06 <sup>a</sup>               | 46.28 ± 0.38 <sup>bc</sup>                   |
| <i>L. plantarum</i> 2 | 11.36 ± 0.66 <sup>f</sup>          | 81.32 ± 0.23 <sup>a</sup>               | 52.34 ± 0.22 <sup>b</sup>                    |
| <i>L. plantarum</i> 3 | 10.58 ± 0.02 <sup>f</sup>          | 83.99 ± 1.96 <sup>a</sup>               | 49.20 ± 0.24 <sup>b</sup>                    |
| <i>L. plantarum</i> 4 | 11.34 ± 0.31 <sup>f</sup>          | 80.91 ± 1.02 <sup>a</sup>               | 53.22 ± 0.53 <sup>b</sup>                    |
| <i>L. plantarum</i> 5 | 11.32 ± 0.21 <sup>f</sup>          | 82.36 ± 0.99 <sup>a</sup>               | 41.08 ± 0.13 <sup>c</sup>                    |
| <i>L. plantarum</i> 6 | 19.77 ± 1.21 <sup>c</sup>          | 84.77 ± 0.68 <sup>a</sup>               | 52.49 ± 0.22 <sup>b</sup>                    |
| <i>L. plantarum</i> 7 | 6.90 ± 0.23 <sup>fg</sup>          | 81.02 ± 2.22 <sup>a</sup>               | 38.23 ± 0.32 <sup>c</sup>                    |
| <i>L. plantarum</i> 8 | 10.99 ± 0.98 <sup>f</sup>          | 80.02 ± 0.19 <sup>a</sup>               | 39.96 ± 0.09 <sup>c</sup>                    |



|                             |                            |                            |                            |
|-----------------------------|----------------------------|----------------------------|----------------------------|
| <i>L. plantarum</i> 9       | 11.21 ± 0.11 <sup>f</sup>  | 80.69 ± 0.64 <sup>a</sup>  | 43.22 ± 0.06 <sup>c</sup>  |
| <i>L. plantarum</i> 10      | 11.33 ± 0.14 <sup>f</sup>  | 81.69 ± 0.99 <sup>a</sup>  | 47.44 ± 0.03 <sup>bc</sup> |
| <i>L. plantarum</i> 11      | 9.70 ± 0.16 <sup>f</sup>   | 79.23 ± 0.64 <sup>a</sup>  | 41.22 ± 0.07 <sup>c</sup>  |
| <i>L. plantarum</i> 12      | 11.84 ± 0.32 <sup>f</sup>  | 78.66 ± 0.78 <sup>a</sup>  | 37.37 ± 0.64 <sup>c</sup>  |
| <i>L. fermentum</i> 13      | 25.66 ± 0.91 <sup>de</sup> | 81.87 ± 1.3 <sup>a</sup>   | 36.26 ± 0.13 <sup>c</sup>  |
| <i>L. fermentum</i> 14      | 29.78 ± 0.51 <sup>de</sup> | 69.46 ± 1.94 <sup>ab</sup> | 45.22 ± 0.05 <sup>bc</sup> |
| <i>L. fermentum</i> 15      | 34.39 ± 0.71 <sup>d</sup>  | 65.00 ± 2.89 <sup>b</sup>  | 44.66 ± 0.19 <sup>bc</sup> |
| <i>L. fermentum</i> 16      | 40.27 ± 0.73 <sup>cd</sup> | 58.89 ± 1.92 <sup>b</sup>  | 48.22 ± 0.45 <sup>b</sup>  |
| <i>L. fermentum</i> 17      | 42.42 ± 0.76 <sup>cd</sup> | 61.70 ± 0.22 <sup>b</sup>  | 41.33 ± 0.34 <sup>c</sup>  |
| <i>L. fermentum</i> 18      | 46.96 ± 0.91 <sup>c</sup>  | 62.36 ± 0.66 <sup>b</sup>  | 38.33 ± 0.12 <sup>c</sup>  |
| <i>L. fermentum</i> 19      | 48.28 ± 0.34 <sup>c</sup>  | 62.50 ± 0.97 <sup>b</sup>  | 37.22 ± 0.71 <sup>c</sup>  |
| <i>L. fermentum</i> 20      | 48.35 ± 0.62 <sup>c</sup>  | 57.56 ± 0.58 <sup>b</sup>  | 46.36 ± 0.30 <sup>bc</sup> |
| <i>L. fermentum</i> 21      | 8.37 ± 0.52 <sup>f</sup>   | 58.87 ± 1.61 <sup>b</sup>  | 39.91 ± 0.16 <sup>c</sup>  |
| <i>L. fermentum</i> 22      | 24.7 ± 0.16 <sup>de</sup>  | 64.76 ± 1.94 <sup>b</sup>  | 21.22 ± 0.82 <sup>d</sup>  |
| <i>L. fermentum</i> 23      | 65.53 ± 0.42 <sup>b</sup>  | 61.32 ± 2.91 <sup>b</sup>  | 36.31 ± 0.19 <sup>c</sup>  |
| <i>L. fermentum</i> 24      | 80.85 ± 0.32 <sup>a</sup>  | 64.15 ± 0.71 <sup>b</sup>  | 34.27 ± 0.13 <sup>cd</sup> |
| <i>L. fermentum</i> 25      | 40.91 ± 0.52 <sup>cd</sup> | 60.39 ± 0.36 <sup>b</sup>  | 53.47 ± 0.08 <sup>b</sup>  |
| <i>L. fermentum</i> 26      | 45.01 ± 0.85 <sup>c</sup>  | 59.45 ± 0.60 <sup>b</sup>  | 29.22 ± 0.02 <sup>d</sup>  |
| <i>L. fermentum</i> 27      | 9.40 ± 0.81 <sup>f</sup>   | 58.92 ± 0.97 <sup>b</sup>  | 42.34 ± 0.09 <sup>c</sup>  |
| <i>L. fermentum</i> 28      | 19.43 ± 0.64 <sup>c</sup>  | 64.36 ± 1.09 <sup>b</sup>  | 38.23 ± 0.09 <sup>c</sup>  |
| <i>L. fermentum</i> 29      | 6.04 ± 0.31 <sup>fg</sup>  | 57.46 ± 1.34 <sup>b</sup>  | 40.69 ± 0.31 <sup>c</sup>  |
| <i>L. casei</i> 30          | 17.51 ± 0.16 <sup>c</sup>  | 55.36 ± 1.88 <sup>bc</sup> | 43.56 ± 0.62 <sup>c</sup>  |
| <i>L. casei</i> 31          | 11.39 ± 0.19 <sup>f</sup>  | 61.29 ± 0.72 <sup>b</sup>  | 43.66 ± 0.22 <sup>c</sup>  |
| <i>L. casei</i> 32          | 13.41 ± 0.44 <sup>ef</sup> | 73.33 ± 0.96 <sup>ab</sup> | 49.27 ± 0.94 <sup>b</sup>  |
| <i>L. casei</i> 33          | 43.55 ± 0.99 <sup>cd</sup> | 50.13 ± 0.82 <sup>c</sup>  | 41.26 ± 0.03 <sup>c</sup>  |
| <i>L. casei</i> 34          | 19.19 ± 0.61 <sup>c</sup>  | 56.22 ± 0.14 <sup>bc</sup> | 26.94 ± 0.31 <sup>d</sup>  |
| <i>L. casei</i> 35          | 52.65 ± 0.19 <sup>c</sup>  | 52.33 ± 0.42 <sup>c</sup>  | 35.13 ± 0.43 <sup>cd</sup> |
| <i>L. paracasei</i> 36      | 37.61 ± 0.45 <sup>d</sup>  | 66.32 ± 0.27 <sup>b</sup>  | 43.29 ± 0.49 <sup>c</sup>  |
| <i>L. paracasei</i> 37      | 15.44 ± 0.64 <sup>ef</sup> | 51.97 ± 0.51 <sup>c</sup>  | 44.95 ± 0.27 <sup>c</sup>  |
| <i>L. paracasei</i> 38      | 11.84 ± 0.19 <sup>f</sup>  | 50.63 ± 0.17 <sup>c</sup>  | 44.04 ± 0.52 <sup>c</sup>  |
| <i>L. paracasei</i> 39      | 52.86 ± 0.34 <sup>c</sup>  | 54.23 ± 0.05 <sup>c</sup>  | 64.08 ± 0.81 <sup>a</sup>  |
| <i>Lc. lactis</i> 40        | 37.68 ± 0.56 <sup>d</sup>  | 39.32 ± 0.63 <sup>d</sup>  | 59.26 ± 0.29 <sup>ab</sup> |
| <i>Lc. lactis</i> 41        | 1.92 ± 0.95 <sup>g</sup>   | 37.46 ± 1.97 <sup>d</sup>  | 51.32 ± 0.16 <sup>b</sup>  |
| <i>Lc. lactis</i> 42        | 1.85 ± 0.81 <sup>g</sup>   | 29.44 ± 1.63 <sup>c</sup>  | 50.32 ± 0.14 <sup>b</sup>  |
| <i>L. rhamnosus</i> 43      | 15.43 ± 0.45 <sup>ef</sup> | 88.93 ± 1.68 <sup>a</sup>  | 54.74 ± 0.61 <sup>b</sup>  |
| <i>L. rhamnosus</i> 44      | 33.87 ± 0.79 <sup>d</sup>  | 82.13 ± 1.33 <sup>a</sup>  | 66.88 ± 0.15 <sup>a</sup>  |
| <i>L. rhamnosus</i> 45      | 7.07 ± 0.76 <sup>fg</sup>  | 80.32 ± 0.18 <sup>a</sup>  | 73.91 ± 0.20 <sup>a</sup>  |
| <i>L. rhamnosus</i> 46      | 5.50 ± 0.82 <sup>fg</sup>  | 83.46 ± 1.18 <sup>a</sup>  | 52.26 ± 0.25 <sup>b</sup>  |
| <i>L. rhamnosus</i> 47      | 9.63 ± 0.34 <sup>f</sup>   | 83.94 ± 1.56 <sup>a</sup>  | 63.55 ± 0.17 <sup>ab</sup> |
| <i>L. salivarius</i> 48     | 5.50 ± 0.48 <sup>fg</sup>  | 80.22 ± 1.53 <sup>a</sup>  | 67.91 ± 0.52 <sup>a</sup>  |
| <i>L. salivarius</i> 49     | 5.88 ± 0.19 <sup>fg</sup>  | 80.97 ± 1.67 <sup>a</sup>  | 69.91 ± 0.51 <sup>a</sup>  |
| <i>L. salivarius</i> 50     | 10.90 ± 0.67 <sup>f</sup>  | 87.49 ± 1.19 <sup>a</sup>  | 70.47 ± 0.11 <sup>a</sup>  |
| CICC 20261                  | 11.54 ± 0.52 <sup>f</sup>  | 58.09 ± 1.92 <sup>b</sup>  | 43.25 ± 0.13 <sup>c</sup>  |
| Amoxicillin                 | -                          | 95.55 ± 3.34 <sup>a</sup>  | -                          |
| Metronidazole               | -                          | 90.00 ± 2.62 <sup>a</sup>  | -                          |
| Amoxicillin & metronidazole | -                          | 97.18 ± 1.88 <sup>a</sup>  | -                          |

47 <sup>a</sup> Transit tolerance of LAB to artificial gastrointestinal tracts was determined by survival rate through the artificial gastric fluid (pH 2.5) containing  
48 pepsin (0.3% w/v) and artificial pancreatic fluid (pH 8.0) containing trypsin (0.1% w/v). <sup>b</sup> Urease inhibition rate was analyzed using a modified phenol  
49 red method. <sup>c</sup> Cell surface hydrophobicity of LAB was determined by bacterial adhesion to hydrocarbons (BATH) method. Results are expressed as  
50 mean of triplicate values ± standard deviation. Different lowercase letters mean significant ( $P < 0.05$ ) differences in a column.

51 Table S 4 The pH value, acid concentration and inhibition zone diameter of LAB strains

| Strain name            | pH <sup>a</sup>    | Acid concentration <sup>b</sup> (mmol L <sup>-1</sup> ) |                           | Inhibition zone diameter <sup>c</sup> (mm) |                            |                            |
|------------------------|--------------------|---------------------------------------------------------|---------------------------|--------------------------------------------|----------------------------|----------------------------|
|                        |                    | Lactic acid                                             | Acetic acid               | <i>H. pylori</i> 26695                     | <i>H. pylori</i> 43504     | <i>H. pylori</i> SS1       |
| <i>L. plantarum</i> 1  | 3.63 <sup>a</sup>  | 125.72 ± 0.09 <sup>a</sup>                              | 8.38 ± 0.29 <sup>a</sup>  | 23.66 ± 0.41 <sup>b</sup>                  | 28.18 ± 0.35 <sup>bc</sup> | 21.23 ± 1.10 <sup>b</sup>  |
| <i>L. plantarum</i> 2  | 3.63 <sup>a</sup>  | 125.26 ± 0.75 <sup>a</sup>                              | 8.25 ± 0.08 <sup>a</sup>  | 22.61 ± 0.12 <sup>bc</sup>                 | 29.38 ± 0.20 <sup>bc</sup> | 19.48 ± 0.14 <sup>c</sup>  |
| <i>L. plantarum</i> 3  | 3.63 <sup>a</sup>  | 134.55 ± 3.15 <sup>a</sup>                              | 9.18 ± 0.24 <sup>a</sup>  | 25.54 ± 1.46 <sup>ab</sup>                 | 30.99 ± 0.73 <sup>b</sup>  | 22.11 ± 0.05 <sup>b</sup>  |
| <i>L. plantarum</i> 4  | 3.60 <sup>a</sup>  | 136.16 ± 1.05 <sup>a</sup>                              | 8.36 ± 0.15 <sup>a</sup>  | 25.64 ± 0.58 <sup>ab</sup>                 | 28.01 ± 0.43 <sup>bc</sup> | 21.21 ± 2.05 <sup>b</sup>  |
| <i>L. plantarum</i> 5  | 3.60 <sup>a</sup>  | 129.55 ± 1.52 <sup>a</sup>                              | 8.65 ± 0.30 <sup>a</sup>  | 25.54 ± 0.22 <sup>ab</sup>                 | 33.43 ± 0.41 <sup>ab</sup> | 22.55 ± 0.21 <sup>ab</sup> |
| <i>L. plantarum</i> 6  | 3.63 <sup>a</sup>  | 124.93 ± 0.86 <sup>a</sup>                              | 7.90 ± 0.37 <sup>a</sup>  | 22.57 ± 0.24 <sup>bc</sup>                 | 27.75 ± 0.55 <sup>bc</sup> | 20.38 ± 0.05 <sup>c</sup>  |
| <i>L. plantarum</i> 7  | 3.66 <sup>a</sup>  | 118.36 ± 1.95 <sup>a</sup>                              | 8.06 ± 0.30 <sup>a</sup>  | 22.02 ± 0.14 <sup>bc</sup>                 | 27.87 ± 1.01 <sup>bc</sup> | 20.68 ± 0.31 <sup>c</sup>  |
| <i>L. plantarum</i> 8  | 3.63 <sup>a</sup>  | 122.50 ± 0.17 <sup>a</sup>                              | 8.38 ± 0.13 <sup>a</sup>  | 21.26 ± 0.16 <sup>c</sup>                  | 28.64 ± 0.15 <sup>bc</sup> | 20.31 ± 1.14 <sup>c</sup>  |
| <i>L. plantarum</i> 9  | 3.61 <sup>a</sup>  | 123.60 ± 0.80 <sup>a</sup>                              | 8.39 ± 0.28 <sup>a</sup>  | 22.46 ± 1.01 <sup>bc</sup>                 | 28.06 ± 0.09 <sup>bc</sup> | 20.36 ± 0.16 <sup>c</sup>  |
| <i>L. plantarum</i> 10 | 3.61 <sup>a</sup>  | 128.12 ± 0.46 <sup>a</sup>                              | 8.24 ± 0.16 <sup>a</sup>  | 22.74 ± 0.14 <sup>bc</sup>                 | 28.22 ± 1.22 <sup>bc</sup> | 21.18 ± 0.05 <sup>b</sup>  |
| <i>L. plantarum</i> 11 | 3.63 <sup>a</sup>  | 126.61 ± 0.48 <sup>a</sup>                              | 8.32 ± 0.17 <sup>a</sup>  | 22.61 ± 0.24 <sup>bc</sup>                 | 28.11 ± 0.45 <sup>bc</sup> | 19.41 ± 1.21 <sup>c</sup>  |
| <i>L. plantarum</i> 12 | 3.67 <sup>a</sup>  | 112.49 ± 0.23 <sup>ab</sup>                             | 7.93 ± 0.01 <sup>a</sup>  | 21.40 ± 0.02 <sup>c</sup>                  | 28.62 ± 0.02 <sup>bc</sup> | 19.69 ± 0.34 <sup>c</sup>  |
| <i>L. fermentum</i> 13 | 4.61 <sup>c</sup>  | 42.68 ± 1.05 <sup>c</sup>                               | 6.65 ± 0.65 <sup>a</sup>  | 12.22 ± 0.39 <sup>c</sup>                  | 17.87 ± 0.73 <sup>de</sup> | 10.93 ± 0.05 <sup>c</sup>  |
| <i>L. fermentum</i> 14 | 4.06 <sup>b</sup>  | 83.78 ± 1.56 <sup>c</sup>                               | 9.33 ± 0.11 <sup>a</sup>  | 16.85 ± 0.40 <sup>d</sup>                  | 19.35 ± 1.01 <sup>d</sup>  | 17.56 ± 0.32 <sup>cd</sup> |
| <i>L. fermentum</i> 15 | 4.27 <sup>b</sup>  | 59.06 ± 1.08 <sup>d</sup>                               | 9.14 ± 0.21 <sup>a</sup>  | 14.08 ± 1.29 <sup>de</sup>                 | 14.49 ± 0.42 <sup>c</sup>  | 11.16 ± 1.09 <sup>c</sup>  |
| <i>L. fermentum</i> 16 | 4.25 <sup>b</sup>  | 58.21 ± 0.35 <sup>d</sup>                               | 8.39 ± 0.07 <sup>a</sup>  | 15.44 ± 0.05 <sup>d</sup>                  | 15.64 ± 2.21 <sup>c</sup>  | 10.94 ± 1.05 <sup>c</sup>  |
| <i>L. fermentum</i> 17 | 4.27 <sup>b</sup>  | 65.56 ± 0.40 <sup>d</sup>                               | 9.26 ± 0.15 <sup>a</sup>  | 16.47 ± 0.24 <sup>d</sup>                  | 19.88 ± 0.28 <sup>d</sup>  | 10.30 ± 0.97 <sup>c</sup>  |
| <i>L. fermentum</i> 18 | 4.26 <sup>b</sup>  | 63.85 ± 0.54 <sup>d</sup>                               | 8.43 ± 0.11 <sup>a</sup>  | 16.01 ± 0.16 <sup>d</sup>                  | 18.59 ± 1.12 <sup>d</sup>  | 9.37 ± 0.49 <sup>c</sup>   |
| <i>L. fermentum</i> 19 | 4.24 <sup>b</sup>  | 68.33 ± 0.40 <sup>cd</sup>                              | 8.65 ± 0.15 <sup>a</sup>  | 15.88 ± 0.04 <sup>d</sup>                  | 15.96 ± 0.30 <sup>c</sup>  | 13.66 ± 0.72 <sup>d</sup>  |
| <i>L. fermentum</i> 20 | 4.18 <sup>b</sup>  | 79.46 ± 0.76 <sup>c</sup>                               | 8.76 ± 0.10 <sup>a</sup>  | 16.10 ± 0.13 <sup>d</sup>                  | 16.44 ± 0.05 <sup>c</sup>  | 16.33 ± 0.27 <sup>cd</sup> |
| <i>L. fermentum</i> 21 | 4.20 <sup>b</sup>  | 78.85 ± 0.64 <sup>c</sup>                               | 10.16 ± 0.11 <sup>a</sup> | 15.78 ± 2.10 <sup>d</sup>                  | 16.25 ± 1.15 <sup>c</sup>  | 14.25 ± 0.23 <sup>d</sup>  |
| <i>L. fermentum</i> 22 | 4.25 <sup>b</sup>  | 58.06 ± 0.97 <sup>d</sup>                               | 9.18 ± 0.18 <sup>a</sup>  | 15.03 ± 0.31 <sup>de</sup>                 | 17.36 ± 0.40 <sup>de</sup> | 9.35 ± 1.35 <sup>c</sup>   |
| <i>L. fermentum</i> 23 | 4.32 <sup>b</sup>  | 63.77 ± 0.57 <sup>d</sup>                               | 10.10 ± 0.93 <sup>a</sup> | 16.07 ± 0.04 <sup>d</sup>                  | 19.17 ± 0.19 <sup>d</sup>  | 11.92 ± 0.84 <sup>de</sup> |
| <i>L. fermentum</i> 24 | 4.29 <sup>b</sup>  | 57.37 ± 0.3 <sup>d</sup>                                | 8.32 ± 0.16 <sup>a</sup>  | 14.87 ± 0.44 <sup>de</sup>                 | 16.77 ± 2.05 <sup>de</sup> | 10.55 ± 0.22 <sup>c</sup>  |
| <i>L. fermentum</i> 25 | 4.25 <sup>b</sup>  | 66.81 ± 0.39 <sup>d</sup>                               | 10.49 ± 0.42 <sup>a</sup> | 14.58 ± 1.23 <sup>de</sup>                 | 15.25 ± 0.54 <sup>c</sup>  | 11.33 ± 0.69 <sup>de</sup> |
| <i>L. fermentum</i> 26 | 4.24 <sup>b</sup>  | 60.62 ± 0.95 <sup>d</sup>                               | 9.17 ± 0.24 <sup>a</sup>  | 15.42 ± 0.05 <sup>d</sup>                  | 14.74 ± 0.79 <sup>c</sup>  | 12.33 ± 0.29 <sup>de</sup> |
| <i>L. fermentum</i> 27 | 4.28 <sup>b</sup>  | 59.26 ± 0.08 <sup>d</sup>                               | 9.08 ± 0.24 <sup>a</sup>  | 15.53 ± 0.23 <sup>d</sup>                  | 17.99 ± 0.88 <sup>d</sup>  | 11.46 ± 0.27 <sup>de</sup> |
| <i>L. fermentum</i> 28 | 4.17 <sup>b</sup>  | 58.43 ± 0.02 <sup>d</sup>                               | 9.08 ± 0.29 <sup>a</sup>  | 14.58 ± 1.01 <sup>de</sup>                 | 13.63 ± 1.15 <sup>c</sup>  | 11.03 ± 1.31 <sup>c</sup>  |
| <i>L. fermentum</i> 29 | 4.35 <sup>b</sup>  | 63.25 ± 0.42 <sup>d</sup>                               | 8.26 ± 0.19 <sup>a</sup>  | 13.66 ± 0.35 <sup>de</sup>                 | 19.37 ± 0.31 <sup>d</sup>  | 11.49 ± 0.28 <sup>de</sup> |
| <i>L. casei</i> 30     | 4.25 <sup>b</sup>  | 60.56 ± 0.81 <sup>d</sup>                               | 8.47 ± 0.54 <sup>a</sup>  | 16.66 ± 0.16 <sup>d</sup>                  | 14.74 ± 0.74 <sup>c</sup>  | 11.55 ± 0.32 <sup>de</sup> |
| <i>L. casei</i> 31     | 3.85 <sup>ab</sup> | 99.34 ± 0.39 <sup>b</sup>                               | 7.56 ± 0.20 <sup>a</sup>  | 18.85 ± 0.21 <sup>cd</sup>                 | 22.95 ± 0.31 <sup>cd</sup> | 14.09 ± 0.15 <sup>d</sup>  |
| <i>L. casei</i> 32     | 3.90 <sup>ab</sup> | 99.39 ± 0.37 <sup>b</sup>                               | 8.45 ± 0.05 <sup>a</sup>  | 19.67 ± 0.05 <sup>cd</sup>                 | 16.14 ± 1.28 <sup>c</sup>  | 15.58 ± 0.37 <sup>d</sup>  |
| <i>Lc. casei</i> 33    | 3.66 <sup>a</sup>  | 115.05 ± 0.74 <sup>ab</sup>                             | 8.53 ± 0.06 <sup>a</sup>  | 21.26 ± 0.32 <sup>c</sup>                  | 28.51 ± 0.15 <sup>b</sup>  | 19.79 ± 1.11 <sup>c</sup>  |
| <i>Lc. casei</i> 34    | 4.33 <sup>b</sup>  | 61.65 ± 0.45 <sup>d</sup>                               | 8.83 ± 0.14 <sup>a</sup>  | 15.45 ± 0.50 <sup>d</sup>                  | 15.11 ± 2.00 <sup>c</sup>  | 14.02 ± 0.30 <sup>d</sup>  |
| <i>Lc. casei</i> 35    | 4.32 <sup>b</sup>  | 68.03 ± 0.33 <sup>cd</sup>                              | 8.25 ± 0.35 <sup>a</sup>  | 15.97 ± 1.37 <sup>d</sup>                  | 17.31 ± 0.04 <sup>de</sup> | 13.63 ± 2.21 <sup>d</sup>  |
| <i>L. paracasei</i> 36 | 3.85 <sup>ab</sup> | 66.42 ± 0.36 <sup>cd</sup>                              | 8.11 ± 0.22 <sup>a</sup>  | 16.74 ± 0.37 <sup>d</sup>                  | 15.39 ± 0.09 <sup>c</sup>  | 10.85 ± 0.60 <sup>c</sup>  |
| <i>L. paracasei</i> 37 | 3.86 <sup>ab</sup> | 78.03 ± 0.39 <sup>c</sup>                               | 7.65 ± 0.45 <sup>a</sup>  | 15.80 ± 0.22 <sup>d</sup>                  | 16.80 ± 0.29 <sup>de</sup> | 17.15 ± 0.04 <sup>cd</sup> |
| <i>L. paracasei</i> 38 | 3.80 <sup>ab</sup> | 82.05 ± 1.85 <sup>c</sup>                               | 7.95 ± 0.12 <sup>a</sup>  | 16.65 ± 0.16 <sup>d</sup>                  | 16.97 ± 0.38 <sup>de</sup> | 16.71 ± 0.09 <sup>cd</sup> |
| <i>L. paracasei</i> 39 | 3.80 <sup>ab</sup> | 80.93 ± 0.34 <sup>c</sup>                               | 7.65 ± 0.28 <sup>a</sup>  | 16.23 ± 0.00 <sup>d</sup>                  | 16.91 ± 0.35 <sup>de</sup> | 16.69 ± 2.10 <sup>cd</sup> |
| <i>L. lactis</i> 40    | 3.88 <sup>ab</sup> | 55.35 ± 1.45 <sup>d</sup>                               | 9.32 ± 0.18 <sup>a</sup>  | 12.14 ± 0.26 <sup>c</sup>                  | 15.86 ± 0.18 <sup>c</sup>  | 10.16 ± 0.01 <sup>c</sup>  |
| <i>L. lactis</i> 41    | 4.25 <sup>b</sup>  | 54.74 ± 0.75 <sup>d</sup>                               | 7.60 ± 0.23 <sup>a</sup>  | 12.45 ± 0.29 <sup>c</sup>                  | 14.35 ± 1.01 <sup>c</sup>  | 10.15 ± 2.02 <sup>c</sup>  |
| <i>L. lactis</i> 42    | 4.31 <sup>b</sup>  | 67.92 ± 0.64 <sup>cd</sup>                              | 7.64 ± 0.45 <sup>a</sup>  | 15.00 ± 0.50 <sup>de</sup>                 | 15.38 ± 0.03 <sup>c</sup>  | 12.47 ± 0.19 <sup>de</sup> |
| <i>L. rhamnosus</i> 43 | 3.63 <sup>a</sup>  | 98.31 ± 3.23 <sup>b</sup>                               | 7.97 ± 0.34 <sup>a</sup>  | 23.73 ± 0.72 <sup>b</sup>                  | 25.65 ± 0.05 <sup>c</sup>  | 19.46 ± 0.23 <sup>c</sup>  |
| <i>L. rhamnosus</i> 44 | 3.63 <sup>a</sup>  | 106.56 ± 0.52 <sup>b</sup>                              | 8.54 ± 0.00 <sup>a</sup>  | 24.08 ± 0.55 <sup>b</sup>                  | 30.83 ± 0.65 <sup>b</sup>  | 20.41 ± 2.14 <sup>c</sup>  |
| <i>L. rhamnosus</i> 45 | 3.64 <sup>a</sup>  | 106.46 ± 1.51 <sup>b</sup>                              | 8.76 ± 0.05 <sup>a</sup>  | 23.65 ± 0.10 <sup>b</sup>                  | 25.27 ± 1.32 <sup>c</sup>  | 19.44 ± 0.12 <sup>c</sup>  |
| <i>L. rhamnosus</i> 46 | 3.62 <sup>a</sup>  | 94.85 ± 0.22 <sup>b</sup>                               | 8.38 ± 0.04 <sup>a</sup>  | 24.12 ± 1.25 <sup>b</sup>                  | 29.70 ± 0.16 <sup>b</sup>  | 22.26 ± 0.58 <sup>b</sup>  |

|                                |                    |                            |                          |                            |                            |                            |
|--------------------------------|--------------------|----------------------------|--------------------------|----------------------------|----------------------------|----------------------------|
| <i>L. rhamnosus</i> 47         | 3.94 <sup>ab</sup> | 95.18 ± 1.23 <sup>b</sup>  | 7.56 ± 0.50 <sup>a</sup> | 17.55 ± 0.24 <sup>d</sup>  | 21.33 ± 0.67 <sup>d</sup>  | 17.38 ± 0.06 <sup>cd</sup> |
| <i>L. salivarius</i> 48        | 3.68 <sup>a</sup>  | 102.65 ± 1.22 <sup>b</sup> | 7.55 ± 0.55 <sup>a</sup> | 22.25 ± 0.05 <sup>c</sup>  | 27.50 ± 0.16 <sup>bc</sup> | 18.13 ± 0.41 <sup>cd</sup> |
| <i>L. salivarius</i> 49        | 3.66 <sup>a</sup>  | 107.45 ± 0.82 <sup>b</sup> | 8.15 ± 0.15 <sup>a</sup> | 24.00 ± 0.25 <sup>b</sup>  | 28.62 ± 0.15 <sup>bc</sup> | 19.50 ± 0.25 <sup>c</sup>  |
| <i>L. salivarius</i> 50        | 3.62 <sup>a</sup>  | 107.11 ± 2.70 <sup>b</sup> | 8.35 ± 0.05 <sup>a</sup> | 25.47 ± 1.24 <sup>ab</sup> | 32.27 ± 0.01 <sup>b</sup>  | 20.00 ± 1.21 <sup>c</sup>  |
| CICC 20261                     | 4.22 <sup>b</sup>  | 81.56 ± 0.85 <sup>c</sup>  | 8.39 ± 0.03 <sup>a</sup> | 15.02 ± 0.33 <sup>dc</sup> | 15.04 ± 0.31 <sup>c</sup>  | 13.20 ± 0.22 <sup>d</sup>  |
| Amoxicillin                    |                    |                            |                          | 26.54 ± 0.67 <sup>ab</sup> | 34.91 ± 0.67 <sup>ab</sup> | 22.21 ± 1.05 <sup>b</sup>  |
| Metronidazole                  |                    |                            |                          | 25.92 ± 1.32 <sup>ab</sup> | 34.56 ± 0.98 <sup>ab</sup> | 21.45 ± 1.65 <sup>b</sup>  |
| Mixed antibiotics <sup>a</sup> |                    |                            |                          | 28.24 ± 1.16 <sup>a</sup>  | 37.06 ± 0.91 <sup>a</sup>  | 25.21 ± 1.43 <sup>a</sup>  |
| MRS                            |                    |                            |                          | 6.00 ± 0.00 <sup>f</sup>   | 6.00 ± 0.00 <sup>f</sup>   | 6.00 ± 0.00 <sup>f</sup>   |

52 <sup>a</sup> pH value of the LAB supernatant was measured by a pH meter. <sup>b</sup> Acid concentration of the LAB supernatant was determined using a high-performance  
53 liquid chromatograph. <sup>c</sup> Inhibition zone diameter of LAB strain against *H. pylori* was determined by agar-well diffusion assay. Results are expressed as  
54 mean of triplicate values ± standard deviation. Different lowercase letters mean significant ( $P < 0.05$ ) differences in a column.  
55

56 Table S 5 Pearson correlation coefficient between lactic concentration and inhibition zones of 51 LAB strains

| Indicator bacteria     | Pearson's $r^a$ |
|------------------------|-----------------|
| <i>H. pylori</i> 26695 | 0.91            |
| <i>H. pylori</i> 43504 | 0.88            |
| <i>H. pylori</i> SS1   | 0.91            |

57 <sup>a</sup> Pearson's correlation coefficients (r) were calculated by software SPSS.

58

59 Table S 6 Rates of autoaggregation and coaggregation of LAB strains with *H. pylori*

| Strain                 | Autoaggregation <sup>a</sup> (%) |                           |                           |                           | Coaggregation <sup>b</sup> (%) |                           |                           |                           |
|------------------------|----------------------------------|---------------------------|---------------------------|---------------------------|--------------------------------|---------------------------|---------------------------|---------------------------|
|                        | 2h                               | 4h                        | 8h                        | 24 h                      | 2h                             | 4h                        | 8h                        | 24 h                      |
| <i>L. plantarum</i> 1  | 9.79 ± 0.55 <sup>a</sup>         | 14.24 ± 0.91 <sup>a</sup> | 62.65 ± 1.41 <sup>b</sup> | 92.18 ± 0.38 <sup>c</sup> | 18.42 ± 2.46 <sup>a</sup>      | 33.95 ± 2.35 <sup>b</sup> | 35.42 ± 0.78 <sup>b</sup> | 69.90 ± 0.22 <sup>c</sup> |
| <i>L. plantarum</i> 2  | 4.17 ± 0.30 <sup>a</sup>         | 13.29 ± 0.86 <sup>a</sup> | 65.08 ± 3.25 <sup>b</sup> | 90.17 ± 0.74 <sup>c</sup> | 16.50 ± 1.68 <sup>a</sup>      | 37.73 ± 3.18 <sup>b</sup> | 32.73 ± 0.78 <sup>b</sup> | 68.75 ± 1.21 <sup>c</sup> |
| <i>L. plantarum</i> 3  | 5.31 ± 0.38 <sup>a</sup>         | 13.97 ± 1.75 <sup>a</sup> | 54.06 ± 4.95 <sup>b</sup> | 95.41 ± 0.10 <sup>c</sup> | 14.35 ± 0.18 <sup>a</sup>      | 35.57 ± 0.27 <sup>b</sup> | 45.70 ± 1.43 <sup>c</sup> | 72.26 ± 0.44 <sup>d</sup> |
| <i>L. plantarum</i> 4  | 11.61 ± 1.24 <sup>a</sup>        | 11.27 ± 1.08 <sup>a</sup> | 60.53 ± 1.84 <sup>b</sup> | 91.49 ± 0.58 <sup>c</sup> | 22.43 ± 1.60 <sup>a</sup>      | 38.54 ± 0.68 <sup>b</sup> | 58.86 ± 1.42 <sup>c</sup> | 58.83 ± 1.14 <sup>c</sup> |
| <i>L. plantarum</i> 5  | 6.31 ± 0.22 <sup>a</sup>         | 11.82 ± 0.56 <sup>a</sup> | 53.11 ± 5.02 <sup>b</sup> | 86.54 ± 0.70 <sup>c</sup> | 16.57 ± 1.67 <sup>a</sup>      | 30.42 ± 0.72 <sup>b</sup> | 30.96 ± 0.33 <sup>b</sup> | 64.40 ± 0.07 <sup>c</sup> |
| <i>L. plantarum</i> 6  | 4.62 ± 0.26 <sup>a</sup>         | 12.19 ± 0.61 <sup>a</sup> | 43.45 ± 1.23 <sup>b</sup> | 92.54 ± 0.34 <sup>c</sup> | 14.41 ± 0.50 <sup>a</sup>      | 33.88 ± 0.51 <sup>b</sup> | 33.15 ± 0.40 <sup>b</sup> | 53.68 ± 0.21 <sup>c</sup> |
| <i>L. plantarum</i> 7  | 8.86 ± 1.00 <sup>a</sup>         | 25.44 ± 0.09 <sup>b</sup> | 71.45 ± 2.43 <sup>c</sup> | 86.08 ± 0.44 <sup>d</sup> | 15.67 ± 1.58 <sup>a</sup>      | 32.97 ± 0.44 <sup>b</sup> | 37.38 ± 1.14 <sup>b</sup> | 60.01 ± 0.68 <sup>c</sup> |
| <i>L. plantarum</i> 8  | 6.59 ± 0.34 <sup>a</sup>         | 16.72 ± 1.17 <sup>b</sup> | 64.62 ± 3.62 <sup>c</sup> | 85.28 ± 1.15 <sup>d</sup> | 20.98 ± 2.16 <sup>a</sup>      | 49.88 ± 2.19 <sup>c</sup> | 37.27 ± 1.92 <sup>b</sup> | 65.52 ± 0.17 <sup>d</sup> |
| <i>L. plantarum</i> 9  | 5.16 ± 0.18 <sup>a</sup>         | 12.64 ± 1.04 <sup>a</sup> | 30.71 ± 1.80 <sup>c</sup> | 78.27 ± 0.29 <sup>d</sup> | 24.56 ± 0.84 <sup>a</sup>      | 26.54 ± 1.16 <sup>a</sup> | 26.74 ± 1.15 <sup>a</sup> | 68.97 ± 0.12 <sup>b</sup> |
| <i>L. plantarum</i> 10 | 5.52 ± 0.08 <sup>a</sup>         | 11.22 ± 1.02 <sup>a</sup> | 52.99 ± 2.25 <sup>b</sup> | 88.60 ± 0.61 <sup>c</sup> | 21.77 ± 0.95 <sup>a</sup>      | 36.26 ± 0.30 <sup>b</sup> | 39.84 ± 0.48 <sup>b</sup> | 70.36 ± 0.70 <sup>c</sup> |
| <i>L. plantarum</i> 11 | 6.44 ± 0.12 <sup>a</sup>         | 12.91 ± 0.61 <sup>a</sup> | 54.46 ± 3.43 <sup>b</sup> | 91.82 ± 0.30 <sup>c</sup> | 19.44 ± 1.06 <sup>a</sup>      | 33.13 ± 0.10 <sup>b</sup> | 42.30 ± 0.10 <sup>c</sup> | 69.33 ± 0.08 <sup>d</sup> |
| <i>L. plantarum</i> 12 | 11.33 ± 0.68 <sup>a</sup>        | 21.06 ± 0.45 <sup>a</sup> | 58.48 ± 0.29 <sup>b</sup> | 86.23 ± 0.16 <sup>c</sup> | 41.73 ± 1.53 <sup>a</sup>      | 51.71 ± 0.75 <sup>b</sup> | 59.20 ± 1.45 <sup>c</sup> | 68.22 ± 0.08 <sup>d</sup> |
| <i>L. fermentum</i> 13 | 5.92 ± 0.06 <sup>a</sup>         | 16.99 ± 0.44 <sup>b</sup> | 52.15 ± 1.43 <sup>c</sup> | 80.16 ± 1.05 <sup>d</sup> | 38.07 ± 0.65 <sup>a</sup>      | 41.33 ± 0.07 <sup>a</sup> | 44.42 ± 0.15 <sup>a</sup> | 59.51 ± 0.23 <sup>b</sup> |
| <i>L. fermentum</i> 14 | 5.57 ± 0.13 <sup>a</sup>         | 5.17 ± 0.23 <sup>a</sup>  | 32.01 ± 6.94 <sup>b</sup> | 75.88 ± 0.34 <sup>c</sup> | 28.18 ± 0.09 <sup>a</sup>      | 32.20 ± 0.61 <sup>a</sup> | 44.68 ± 0.27 <sup>b</sup> | 57.74 ± 0.82 <sup>c</sup> |
| <i>L. fermentum</i> 15 | 7.52 ± 0.05 <sup>a</sup>         | 12.19 ± 0.06 <sup>a</sup> | 41.91 ± 2.12 <sup>b</sup> | 69.52 ± 0.60 <sup>c</sup> | 17.88 ± 0.43 <sup>a</sup>      | 30.74 ± 0.60 <sup>b</sup> | 43.77 ± 1.47 <sup>c</sup> | 58.55 ± 0.32 <sup>d</sup> |
| <i>L. fermentum</i> 16 | 5.26 ± 0.03 <sup>a</sup>         | 11.66 ± 0.25 <sup>a</sup> | 37.62 ± 1.20 <sup>b</sup> | 69.52 ± 0.54 <sup>c</sup> | 18.65 ± 2.96 <sup>a</sup>      | 37.46 ± 2.87 <sup>b</sup> | 35.51 ± 0.21 <sup>b</sup> | 61.22 ± 0.78 <sup>c</sup> |
| <i>L. fermentum</i> 17 | 6.95 ± 0.33 <sup>a</sup>         | 12.66 ± 0.17 <sup>a</sup> | 34.76 ± 0.05 <sup>b</sup> | 66.82 ± 4.23 <sup>c</sup> | 16.08 ± 1.31 <sup>a</sup>      | 29.04 ± 0.94 <sup>b</sup> | 36.95 ± 0.20 <sup>c</sup> | 53.42 ± 0.22 <sup>d</sup> |
| <i>L. fermentum</i> 18 | 0.00 ± 0.00 <sup>a</sup>         | 0.00 ± 0.00 <sup>a</sup>  | 17.24 ± 2.30 <sup>b</sup> | 70.05 ± 1.55 <sup>c</sup> | 14.90 ± 0.32 <sup>a</sup>      | 35.37 ± 1.58 <sup>b</sup> | 32.69 ± 0.18 <sup>b</sup> | 58.08 ± 2.12 <sup>c</sup> |
| <i>L. fermentum</i> 19 | 5.61 ± 0.44 <sup>a</sup>         | 9.44 ± 0.79 <sup>a</sup>  | 31.18 ± 0.52 <sup>b</sup> | 67.17 ± 0.35 <sup>c</sup> | 26.23 ± 0.08 <sup>a</sup>      | 28.36 ± 2.07 <sup>a</sup> | 35.96 ± 0.13 <sup>b</sup> | 68.16 ± 1.60 <sup>c</sup> |
| <i>L. fermentum</i> 20 | 4.75 ± 0.22 <sup>a</sup>         | 12.05 ± 1.30 <sup>a</sup> | 32.21 ± 0.20 <sup>b</sup> | 62.66 ± 2.13 <sup>c</sup> | 19.46 ± 0.87 <sup>a</sup>      | 26.90 ± 0.70 <sup>b</sup> | 30.12 ± 0.09 <sup>c</sup> | 52.42 ± 0.16 <sup>d</sup> |
| <i>L. fermentum</i> 21 | 8.80 ± 0.07 <sup>a</sup>         | 12.00 ± 0.04 <sup>a</sup> | 36.06 ± 1.74 <sup>b</sup> | 81.39 ± 1.31 <sup>c</sup> | 13.90 ± 1.56 <sup>a</sup>      | 46.70 ± 9.37 <sup>c</sup> | 34.02 ± 0.06 <sup>b</sup> | 58.25 ± 0.63 <sup>d</sup> |
| <i>L. fermentum</i> 22 | 0.00 ± 0.00 <sup>a</sup>         | 2.77 ± 0.42 <sup>a</sup>  | 16.81 ± 1.14 <sup>b</sup> | 54.19 ± 1.49 <sup>c</sup> | 20.59 ± 0.82 <sup>a</sup>      | 43.07 ± 0.02 <sup>b</sup> | 47.71 ± 4.54 <sup>b</sup> | 70.42 ± 0.32 <sup>c</sup> |
| <i>L. fermentum</i> 23 | 3.78 ± 0.15 <sup>a</sup>         | 11.64 ± 1.28 <sup>a</sup> | 36.58 ± 0.47 <sup>b</sup> | 74.96 ± 3.25 <sup>c</sup> | 31.77 ± 1.07 <sup>a</sup>      | 39.54 ± 0.11 <sup>b</sup> | 44.81 ± 0.81 <sup>c</sup> | 70.01 ± 0.35 <sup>d</sup> |
| <i>L. fermentum</i> 24 | 5.54 ± 0.44 <sup>a</sup>         | 9.02 ± 1.55 <sup>a</sup>  | 36.94 ± 0.65 <sup>b</sup> | 83.76 ± 0.16 <sup>c</sup> | 31.01 ± 2.97 <sup>a</sup>      | 37.44 ± 0.76 <sup>b</sup> | 43.51 ± 0.53 <sup>c</sup> | 70.03 ± 0.56 <sup>d</sup> |

|                         |                           |                           |                           |                           |                           |                           |                           |                           |
|-------------------------|---------------------------|---------------------------|---------------------------|---------------------------|---------------------------|---------------------------|---------------------------|---------------------------|
| <i>L. fermentum</i> 25  | 5.90 ± 0.05 <sup>a</sup>  | 8.70 ± 0.68 <sup>a</sup>  | 29.72 ± 1.30 <sup>b</sup> | 66.16 ± 0.12 <sup>c</sup> | 22.36 ± 1.77 <sup>a</sup> | 26.97 ± 0.12 <sup>b</sup> | 36.48 ± 0.91 <sup>c</sup> | 53.69 ± 1.33 <sup>d</sup> |
| <i>L. fermentum</i> 26  | 6.10 ± 0.51 <sup>a</sup>  | 8.13 ± 0.83 <sup>a</sup>  | 21.87 ± 0.08 <sup>b</sup> | 60.74 ± 3.60 <sup>c</sup> | 20.47 ± 0.66 <sup>a</sup> | 30.42 ± 0.37 <sup>b</sup> | 38.08 ± 1.68 <sup>c</sup> | 62.62 ± 0.87 <sup>d</sup> |
| <i>L. fermentum</i> 27  | 4.64 ± 0.08 <sup>a</sup>  | 5.88 ± 0.46 <sup>a</sup>  | 26.61 ± 1.44 <sup>b</sup> | 70.51 ± 1.95 <sup>c</sup> | 12.70 ± 1.25 <sup>a</sup> | 28.19 ± 0.55 <sup>b</sup> | 32.97 ± 0.76 <sup>c</sup> | 57.59 ± 2.18 <sup>d</sup> |
| <i>L. fermentum</i> 28  | 6.50 ± 0.19 <sup>a</sup>  | 9.04 ± 0.13 <sup>a</sup>  | 26.21 ± 0.45 <sup>b</sup> | 71.77 ± 0.28 <sup>c</sup> | 21.62 ± 0.28 <sup>a</sup> | 32.53 ± 0.90 <sup>b</sup> | 42.90 ± 0.92 <sup>c</sup> | 69.25 ± 1.06 <sup>d</sup> |
| <i>L. fermentum</i> 29  | 5.61 ± 0.04 <sup>a</sup>  | 8.68 ± 0.45 <sup>a</sup>  | 29.80 ± 0.82 <sup>b</sup> | 74.74 ± 0.18 <sup>c</sup> | 19.00 ± 0.82 <sup>a</sup> | 23.20 ± 1.72 <sup>b</sup> | 33.35 ± 0.64 <sup>c</sup> | 65.07 ± 0.13 <sup>d</sup> |
| <i>L. casei</i> 30      | 4.64 ± 1.21 <sup>a</sup>  | 9.56 ± 0.19 <sup>a</sup>  | 25.29 ± 1.33 <sup>b</sup> | 79.04 ± 0.93 <sup>c</sup> | 29.16 ± 3.25 <sup>a</sup> | 43.27 ± 3.20 <sup>b</sup> | 40.27 ± 0.88 <sup>b</sup> | 67.62 ± 1.31 <sup>c</sup> |
| <i>L. casei</i> 31      | 6.45 ± 0.20 <sup>a</sup>  | 11.72 ± 0.67 <sup>a</sup> | 27.99 ± 0.78 <sup>b</sup> | 55.69 ± 1.52 <sup>c</sup> | 12.89 ± 0.71 <sup>a</sup> | 35.68 ± 2.21 <sup>c</sup> | 29.68 ± 0.81 <sup>b</sup> | 63.15 ± 1.32 <sup>d</sup> |
| <i>L. casei</i> 32      | 3.15 ± 0.29 <sup>a</sup>  | 5.41 ± 0.09 <sup>a</sup>  | 14.68 ± 0.32 <sup>b</sup> | 51.28 ± 1.53 <sup>c</sup> | 22.64 ± 0.45 <sup>a</sup> | 38.52 ± 0.71 <sup>b</sup> | 39.55 ± 1.22 <sup>b</sup> | 52.43 ± 0.68 <sup>c</sup> |
| <i>L. casei</i> 33      | 3.83 ± 0.31 <sup>a</sup>  | 12.89 ± 0.82 <sup>b</sup> | 26.94 ± 0.68 <sup>c</sup> | 63.42 ± 1.66 <sup>d</sup> | 19.92 ± 1.99 <sup>a</sup> | 30.48 ± 0.12 <sup>b</sup> | 42.48 ± 0.29 <sup>c</sup> | 58.93 ± 0.67 <sup>d</sup> |
| <i>L. casei</i> 34      | 5.51 ± 0.64 <sup>a</sup>  | 17.95 ± 0.66 <sup>b</sup> | 53.99 ± 0.58 <sup>c</sup> | 87.53 ± 0.41 <sup>d</sup> | 22.27 ± 2.41 <sup>a</sup> | 36.13 ± 1.50 <sup>b</sup> | 38.02 ± 0.15 <sup>b</sup> | 61.20 ± 1.32 <sup>c</sup> |
| <i>L. casei</i> 35      | 2.81 ± 0.39 <sup>a</sup>  | 4.72 ± 0.44 <sup>a</sup>  | 12.31 ± 1.47 <sup>b</sup> | 41.30 ± 0.13 <sup>c</sup> | 17.48 ± 0.89 <sup>a</sup> | 30.22 ± 0.79 <sup>b</sup> | 33.93 ± 0.77 <sup>b</sup> | 47.94 ± 0.30 <sup>c</sup> |
| <i>L. paracasei</i> 36  | 3.50 ± 0.55 <sup>a</sup>  | 4.89 ± 0.22 <sup>a</sup>  | 21.50 ± 1.30 <sup>b</sup> | 75.67 ± 1.34 <sup>c</sup> | 34.23 ± 0.78 <sup>a</sup> | 39.36 ± 0.73 <sup>b</sup> | 46.74 ± 0.26 <sup>c</sup> | 64.93 ± 1.44 <sup>d</sup> |
| <i>L. paracasei</i> 37  | 3.51 ± 0.19 <sup>a</sup>  | 9.05 ± 0.25 <sup>a</sup>  | 28.02 ± 1.48 <sup>b</sup> | 80.51 ± 2.51 <sup>c</sup> | 17.40 ± 0.76 <sup>a</sup> | 26.85 ± 0.17 <sup>b</sup> | 35.44 ± 1.49 <sup>c</sup> | 43.73 ± 0.66 <sup>d</sup> |
| <i>L. paracasei</i> 38  | 8.13 ± 0.03 <sup>a</sup>  | 12.96 ± 0.71 <sup>a</sup> | 26.58 ± 0.71 <sup>b</sup> | 45.42 ± 1.53 <sup>c</sup> | 20.30 ± 0.22 <sup>a</sup> | 36.60 ± 0.01 <sup>b</sup> | 39.44 ± 0.29 <sup>b</sup> | 56.16 ± 0.98 <sup>c</sup> |
| <i>L. paracasei</i> 39  | 7.73 ± 0.40 <sup>a</sup>  | 13.61 ± 1.23 <sup>a</sup> | 34.03 ± 3.56 <sup>b</sup> | 93.32 ± 0.32 <sup>c</sup> | 17.90 ± 0.40 <sup>a</sup> | 33.24 ± 1.51 <sup>b</sup> | 33.41 ± 0.09 <sup>b</sup> | 73.28 ± 0.05 <sup>c</sup> |
| <i>Lc. lactis</i> 40    | 5.11 ± 0.09 <sup>a</sup>  | 6.95 ± 0.09 <sup>a</sup>  | 15.33 ± 0.13 <sup>b</sup> | 51.37 ± 0.86 <sup>c</sup> | 19.18 ± 0.34 <sup>a</sup> | 30.69 ± 0.87 <sup>b</sup> | 33.44 ± 0.19 <sup>b</sup> | 48.53 ± 0.23 <sup>c</sup> |
| <i>Lc. lactis</i> 41    | 5.04 ± 0.22 <sup>a</sup>  | 12.84 ± 0.44 <sup>b</sup> | 44.93 ± 0.84 <sup>c</sup> | 87.95 ± 2.25 <sup>d</sup> | 17.61 ± 0.26 <sup>a</sup> | 27.73 ± 1.40 <sup>b</sup> | 31.83 ± 1.41 <sup>b</sup> | 62.42 ± 0.36 <sup>c</sup> |
| <i>Lc. lactis</i> 42    | 3.65 ± 1.17 <sup>a</sup>  | 7.16 ± 0.40 <sup>a</sup>  | 34.66 ± 0.91 <sup>b</sup> | 79.63 ± 2.18 <sup>c</sup> | 14.61 ± 0.40 <sup>a</sup> | 32.86 ± 1.28 <sup>b</sup> | 37.72 ± 0.27 <sup>b</sup> | 62.15 ± 1.56 <sup>c</sup> |
| <i>L. rhamnosus</i> 43  | 64.12 ± 0.12 <sup>a</sup> | 71.75 ± 1.10 <sup>b</sup> | 86.09 ± 0.08 <sup>c</sup> | 94.56 ± 1.25 <sup>d</sup> | 54.94 ± 0.04 <sup>a</sup> | 67.59 ± 0.77 <sup>b</sup> | 71.85 ± 0.52 <sup>c</sup> | 89.66 ± 0.18 <sup>d</sup> |
| <i>L. rhamnosus</i> 44  | 49.77 ± 0.60 <sup>a</sup> | 55.25 ± 0.87 <sup>a</sup> | 85.49 ± 1.75 <sup>b</sup> | 91.86 ± 1.40 <sup>c</sup> | 37.56 ± 0.07 <sup>a</sup> | 49.31 ± 0.09 <sup>b</sup> | 57.50 ± 0.27 <sup>c</sup> | 77.14 ± 0.30 <sup>d</sup> |
| <i>L. rhamnosus</i> 45  | 32.76 ± 0.19 <sup>a</sup> | 47.19 ± 1.15 <sup>b</sup> | 63.43 ± 2.09 <sup>c</sup> | 90.78 ± 0.34 <sup>d</sup> | 50.46 ± 1.23 <sup>a</sup> | 54.03 ± 0.27 <sup>b</sup> | 58.86 ± 0.40 <sup>c</sup> | 73.46 ± 0.44 <sup>d</sup> |
| <i>L. rhamnosus</i> 46  | 38.64 ± 0.11 <sup>a</sup> | 44.90 ± 1.25 <sup>a</sup> | 61.82 ± 2.84 <sup>b</sup> | 91.44 ± 1.43 <sup>c</sup> | 40.54 ± 1.30 <sup>a</sup> | 46.16 ± 1.26 <sup>b</sup> | 51.53 ± 0.04 <sup>c</sup> | 73.26 ± 0.59 <sup>d</sup> |
| <i>L. rhamnosus</i> 47  | 51.24 ± 0.49 <sup>a</sup> | 73.88 ± 0.59 <sup>b</sup> | 76.12 ± 1.65 <sup>b</sup> | 90.83 ± 0.52 <sup>c</sup> | 44.50 ± 1.05 <sup>a</sup> | 58.20 ± 0.57 <sup>b</sup> | 66.13 ± 1.75 <sup>c</sup> | 77.32 ± 0.20 <sup>d</sup> |
| <i>L. salivarius</i> 48 | 48.65 ± 0.37 <sup>a</sup> | 54.53 ± 0.32 <sup>a</sup> | 74.05 ± 0.27 <sup>b</sup> | 90.90 ± 0.89 <sup>c</sup> | 40.96 ± 1.74 <sup>a</sup> | 54.89 ± 0.24 <sup>b</sup> | 66.66 ± 0.08 <sup>c</sup> | 75.97 ± 0.70 <sup>d</sup> |
| <i>L. salivarius</i> 49 | 40.11 ± 0.47 <sup>a</sup> | 61.11 ± 0.77 <sup>b</sup> | 84.66 ± 0.98 <sup>c</sup> | 88.53 ± 1.10 <sup>c</sup> | 39.92 ± 1.02 <sup>a</sup> | 46.35 ± 1.22 <sup>b</sup> | 49.89 ± 0.23 <sup>c</sup> | 69.21 ± 2.05 <sup>d</sup> |
| <i>L. salivarius</i> 50 | 64.49 ± 0.09 <sup>a</sup> | 79.35 ± 0.34 <sup>b</sup> | 93.03 ± 0.25 <sup>c</sup> | 97.27 ± 0.05 <sup>c</sup> | 44.01 ± 1.29 <sup>a</sup> | 69.29 ± 0.62 <sup>b</sup> | 73.77 ± 0.52 <sup>b</sup> | 95.65 ± 0.01 <sup>c</sup> |
| CICC 20261              | 4.47 ± 0.39 <sup>a</sup>  | 8.24 ± 1.10 <sup>a</sup>  | 28.23 ± 0.23 <sup>b</sup> | 49.37 ± 0.22 <sup>c</sup> | 13.46 ± 0.55 <sup>a</sup> | 24.29 ± 1.01 <sup>b</sup> | 37.96 ± 1.23 <sup>c</sup> | 55.83 ± 5.25 <sup>d</sup> |

60 <sup>a</sup> Autoaggregation of LAB was determined based on sedimentation characteristics by measuring the absorbance of upper solution at 600 nm using a  
61 Varioskan LUX microplate reader. <sup>b</sup> Coaggregation of LAB with *H. pylori* was determined by measuring the absorbance of the upper solution at 600 nm  
62 after mixed incubation of LAB and *H. pylori* suspension at 37°C for 24 h. Results are expressed as mean of triplicate values ± standard deviation. Different  
63 lowercase letters mean significant ( $P < 0.05$ ) differences in a line.

64

65 Table S 7 Correlation matrix (Pearson (n-1))<sup>a</sup>

| Variables                            | LA producing <sup>b</sup> | AcOH producing <sup>c</sup> | Inhibition zone | Autoaggregation | Coaggregation | Hydrophobicity | Urease inhibition | Transit tolerance |
|--------------------------------------|---------------------------|-----------------------------|-----------------|-----------------|---------------|----------------|-------------------|-------------------|
| LA-producing capacity <sup>b</sup>   | 1                         | -0.177                      | 0.936           | 0.336           | 0.346         | 0.364          | 0.722             | -0.498            |
| AcOH-producing capacity <sup>c</sup> | -0.177                    | 1                           | -0.189          | -0.258          | -0.141        | -0.207         | -0.147            | 0.311             |
| Inhibition zone                      | 0.936                     | -0.189                      | 1               | 0.482           | 0.450         | 0.409          | 0.756             | -0.439            |
| Autoaggregation                      | 0.336                     | -0.258                      | 0.482           | 1               | 0.793         | 0.680          | 0.548             | -0.315            |
| Coaggregation                        | 0.346                     | -0.141                      | 0.450           | 0.793           | 1             | 0.497          | 0.573             | -0.259            |
| Hydrophobicity                       | 0.364                     | -0.207                      | 0.409           | 0.680           | 0.497         | 1              | 0.285             | -0.281            |
| Urease inhibition                    | 0.722                     | -0.147                      | 0.756           | 0.548           | 0.573         | 0.285          | 1                 | -0.308            |
| Transit tolerance                    | -0.498                    | 0.311                       | -0.439          | -0.315          | -0.259        | -0.281         | -0.308            | 1                 |

66 <sup>a</sup> Correlation coefficient matrix (8\*8) was calculated by Pearson formula based on the standardized unification of eight characteristics of the 51 LAB  
67 isolates. <sup>b</sup> LA-producing capacity: lactic acid producing capacity. <sup>c</sup> AcOH-producing capacity: acetic acid producing capacity.

68

69 Table S 8 Total variance explained<sup>a</sup>

| Principal component | Eigenvalue | Variability | Cumulative |
|---------------------|------------|-------------|------------|
|---------------------|------------|-------------|------------|

| number |       | (%)    | (%)     |
|--------|-------|--------|---------|
| PC1    | 4.085 | 51.058 | 51.058  |
| PC2    | 1.253 | 15.656 | 66.714  |
| PC3    | 1.050 | 13.128 | 79.843  |
| PC4    | 0.655 | 8.186  | 88.029  |
| PC5    | 0.552 | 6.895  | 94.924  |
| PC6    | 0.211 | 2.635  | 97.558  |
| PC7    | 0.155 | 1.936  | 99.494  |
| PC8    | 0.040 | 0.506  | 100.000 |

70 <sup>a</sup> Eigenvalues, variability and cumulative contribution of eight eigenvectors were calculated based on matrix and ranked from largest to smallest.

71

72 Table S 9 Eigenvector matrix<sup>a</sup>

| Variables                            | Component matrix |        |        | Eigenvector matrix |        |        |
|--------------------------------------|------------------|--------|--------|--------------------|--------|--------|
|                                      | PC1              | PC2    | PC3    | PC1                | PC2    | PC3    |
| LA-producing capacity <sup>b</sup>   | 0.808            | -0.524 | 0.068  | 0.400              | -0.469 | 0.067  |
| AcOH-producing capacity <sup>c</sup> | -0.339           | -0.084 | 0.817  | -0.168             | -0.075 | 0.798  |
| Inhibition zone                      | 0.863            | -0.395 | 0.126  | 0.427              | -0.353 | 0.123  |
| Autoaggregation                      | 0.787            | 0.530  | 0.055  | 0.389              | 0.473  | 0.054  |
| Coaggregation                        | 0.738            | 0.453  | 0.219  | 0.365              | 0.405  | 0.213  |
| Hydrophobicity                       | 0.652            | 0.469  | -0.062 | 0.322              | 0.419  | -0.061 |
| Urease inhibition                    | 0.811            | -0.224 | 0.276  | 0.401              | -0.200 | 0.269  |
| Transit tolerance                    | -0.570           | 0.242  | 0.481  | -0.282             | 0.217  | 0.469  |

73 <sup>a</sup> Projections of each variable on PC1, PC2 and PC3 were calculated. <sup>b</sup> LA-producing capacity: lactic acid producing capacity. <sup>c</sup> AcOH-producing capacity:

74 acetic acid producing capacity.

75

76 Table S 10 Composite score of lactic acid bacteria calculated by principal component analysis<sup>a</sup>

| Strain name            | Factor score |        |        | Composite score | Ranking |
|------------------------|--------------|--------|--------|-----------------|---------|
|                        | PC1          | PC2    | PC3    |                 |         |
| <i>L. plantarum 1</i>  | 0.696        | -1.499 | -0.028 | 0.565           | 15      |
| <i>L. plantarum 2</i>  | 0.837        | -1.140 | -0.111 | 0.812           | 11      |
| <i>L. plantarum 3</i>  | 1.311        | -1.129 | 1.436  | 1.689           | 8       |
| <i>L. plantarum 4</i>  | 1.184        | -1.225 | 0.248  | 1.303           | 10      |
| <i>L. plantarum 5</i>  | 0.685        | -2.142 | 0.351  | 0.475           | 17      |
| <i>L. plantarum 6</i>  | 0.773        | -1.192 | -0.309 | 0.685           | 12      |
| <i>L. plantarum 7</i>  | 0.663        | -1.408 | -0.448 | 0.472           | 18      |
| <i>L. plantarum 8</i>  | 0.698        | -1.262 | 0.138  | 0.648           | 13      |
| <i>L. plantarum 9</i>  | 0.462        | -1.814 | -0.159 | 0.173           | 20      |
| <i>L. plantarum 10</i> | 0.759        | -1.462 | -0.112 | 0.641           | 14      |
| <i>L. plantarum 11</i> | 0.561        | -1.667 | -0.156 | 0.333           | 19      |
| <i>L. plantarum 12</i> | 0.648        | -1.026 | -0.365 | 0.550           | 16      |
| <i>L. fermentum 13</i> | -0.264       | 0.780  | -1.787 | -0.471          | 25      |
| <i>L. fermentum 14</i> | -0.440       | -0.468 | 0.970  | -0.507          | 26      |
| <i>L. fermentum 15</i> | -0.869       | 0.433  | 0.610  | -0.925          | 34      |
| <i>L. fermentum 16</i> | -0.721       | 0.944  | -0.047 | -0.732          | 31      |
| <i>L. fermentum 17</i> | -0.911       | 0.133  | 0.940  | -0.989          | 37      |
| <i>L. fermentum 18</i> | -0.952       | 0.183  | 0.235  | -1.149          | 42      |
| <i>L. fermentum 19</i> | -0.972       | -0.005 | 0.428  | -1.185          | 44      |

|                         |        |        |        |        |    |
|-------------------------|--------|--------|--------|--------|----|
| <i>L. fermentum</i> 20  | -0.792 | 0.111  | 0.444  | -0.925 | 35 |
| <i>L. fermentum</i> 21  | -0.426 | 0.078  | 1.412  | -0.295 | 23 |
| <i>L. fermentum</i> 22  | -0.993 | -0.257 | 0.766  | -1.210 | 46 |
| <i>L. fermentum</i> 23  | -1.095 | 0.494  | 2.663  | -0.858 | 32 |
| <i>L. fermentum</i> 24  | -1.177 | 0.800  | 1.050  | -1.168 | 43 |
| <i>L. fermentum</i> 25  | -1.037 | 0.367  | 2.067  | -0.911 | 33 |
| <i>L. fermentum</i> 26  | -1.243 | -0.087 | 0.896  | -1.474 | 51 |
| <i>L. fermentum</i> 27  | -0.816 | -0.172 | -0.203 | -1.126 | 41 |
| <i>L. fermentum</i> 28  | -0.860 | 0.089  | 0.214  | -1.055 | 39 |
| <i>L. fermentum</i> 29  | -0.775 | -0.330 | -1.290 | -1.291 | 48 |
| <i>L. casei</i> 30      | -0.562 | 0.684  | -0.444 | -0.650 | 28 |
| <i>L. casei</i> 31      | 0.042  | -0.469 | -1.429 | -0.290 | 22 |
| <i>L. casei</i> 32      | 0.090  | -0.436 | -0.209 | -0.015 | 21 |
| <i>L. casei</i> 33      | -0.536 | -0.293 | 0.208  | -0.721 | 30 |
| <i>L. casei</i> 34      | -0.849 | -0.014 | -0.008 | -1.101 | 40 |
| <i>L. casei</i> 35      | -1.126 | 0.071  | -0.042 | -1.446 | 50 |
| <i>L. paracasei</i> 36  | -0.594 | 0.455  | -0.210 | -0.703 | 29 |
| <i>L. paracasei</i> 37  | -0.538 | -0.173 | -1.694 | -1.019 | 38 |
| <i>L. paracasei</i> 38  | -0.332 | 0.095  | -1.255 | -0.619 | 27 |
| <i>L. paracasei</i> 39  | -0.342 | 1.104  | -0.672 | -0.313 | 24 |
| <i>Lc. lactis</i> 40    | -1.169 | 1.235  | 0.302  | -1.189 | 45 |
| <i>Lc. lactis</i> 41    | -0.850 | 0.841  | -2.524 | -1.339 | 49 |
| <i>Lc. lactis</i> 42    | -0.763 | 0.624  | -2.456 | -1.263 | 47 |
| <i>L. rhamnosus</i> 43  | 1.906  | 1.559  | 0.501  | 2.889  | 2  |
| <i>L. rhamnosus</i> 44  | 1.388  | 1.062  | 1.040  | 2.201  | 7  |
| <i>L. rhamnosus</i> 45  | 1.537  | 1.161  | 0.556  | 2.334  | 4  |
| <i>L. rhamnosus</i> 46  | 1.024  | 0.398  | 0.055  | 1.419  | 9  |
| <i>L. rhamnosus</i> 47  | 1.636  | 2.081  | -0.549 | 2.477  | 3  |
| <i>L. salivarius</i> 48 | 1.657  | 1.319  | -0.757 | 2.302  | 6  |
| <i>L. salivarius</i> 49 | 1.639  | 1.002  | -0.191 | 2.304  | 5  |
| <i>L. salivarius</i> 50 | 2.336  | 2.046  | 0.824  | 3.605  | 1  |
| CICC 20261              | -0.528 | -0.480 | -0.897 | -0.939 | 36 |

77 <sup>a</sup> Composite score is equal to the sum of the product of the variance contributions of each PC and the principal component scores of each strain, which is  
78 calculated from the product of the factor scores and the square root of the eigenvalues for each strain.

79

80 Table S 11 Sequence information of three strains uploaded to the NCBI Genbank database

| Isolate code | Scientific Name                      | Sequence length (bp) | Accession  |
|--------------|--------------------------------------|----------------------|------------|
| NCUH061004   | <i>Lacticaseibacillus rhamnosus</i>  | 1418                 | OQ363660.1 |
| NCUH062003   | <i>Ligilactobacillus salivarius</i>  | 1438                 | OQ363661.1 |
| NCUH001003   | <i>Lactiplantibacillus plantarum</i> | 1403                 | OQ363662.1 |

81

82 Table S 12 Information on RiPPs synthesis genes in the NCUH062003 gene cluster T3PKS<sup>a</sup>

| Genes   | Locations     | Strands | Annotations |
|---------|---------------|---------|-------------|
| chr_457 | 502059 502956 | -       | protein     |
| chr_469 | 511868 512846 | +       | protein     |
| chr_470 | 513231 513918 | +       | protein     |
| chr_472 | 515571 516816 | +       | protein     |

83 <sup>a</sup> Secondary metabolites were sought using antiSMASH (<https://antismash.secondarymetabolites.org>).

84

85 Table S 13 MIBiG database comparison of RiPPs synthesis genes in NCUH062003

| Genes              | MIBiG Protein | Description          | MIBiG Cluster | MiBiG Product       | % ID | % Coverage | BLAST Score | E-value |
|--------------------|---------------|----------------------|---------------|---------------------|------|------------|-------------|---------|
| chr_457_mibig_hits | AIU53932.1    | putative_transposase | BGC0000607    | RiPP: Thiopeptide   | 35   | 57.4       | 88          | 2.1E-17 |
| chr_469_mibig_hits | ABA00873.1    | NsuR                 | BGC0000537    | RiPP: Lanthipeptide | 32   | 98.2       | 134         | 2.6E-31 |
| chr_470_mibig_hits | ADJ56358.1    | NisR                 | BGC0000535    | RiPP: Lanthipeptide | 33   | 101.3      | 119         | 1.1E-26 |
| chr_472_mibig_hits | CAC33839.1    | putative_protein     | BGC0000523    | RiPP: Lanthipeptide | 33   | 64.7       | 152         | 1.7E-36 |

86 <sup>a</sup> Secondary metabolites were sought using antiSMASH (<https://antismash.secondarymetabolites.org>).

87

88 Table S 14 Effect of heat on the antibacterial activity of Salivaricin S3<sup>a</sup>

| Temperatures (°C) | Inhibition zone (mm)      |
|-------------------|---------------------------|
| Control           | 21.25 ± 0.18 <sup>a</sup> |
| 50                | 19.13 ± 1.21 <sup>a</sup> |
| 70                | 20.63 ± 0.12 <sup>a</sup> |
| 90                | 19.49 ± 0.95 <sup>a</sup> |
| 105               | 20.97 ± 0.75 <sup>a</sup> |
| 121               | 18.91 ± 0.66 <sup>a</sup> |

89 <sup>a</sup> Salivaricin S3 were placed in tubes at different temperature (37°C, 50°C, 70°C, 90°C, 105°C, 121°C) for 2 h, respectively, then tested their anti-*H.*

90 *pylori* activity by agar-well diffusion assay. Results are expressed as mean of triplicate values ± standard deviation. Different lowercase letters mean

91 significant ( $P < 0.05$ ) differences in a column.

92

93 Table S 15 Effect of proteases on the antibacterial activity of Salivaricin S3

| Times (h) | Inhibition zone (mm) <sup>a</sup> |                           |                           |                           |                           |                           |
|-----------|-----------------------------------|---------------------------|---------------------------|---------------------------|---------------------------|---------------------------|
|           | Control                           | α-chymotrypsin            | Proteinase K              | Papain                    | Pepsin                    | Trypsin                   |
| 3         | 18.43 ± 0.58 <sup>a</sup>         | 17.80 ± 0.78 <sup>a</sup> | 18.73 ± 0.78 <sup>a</sup> | 17.82 ± 0.92 <sup>a</sup> | 17.43 ± 0.23 <sup>a</sup> | 16.96 ± 0.23 <sup>a</sup> |
| 15        | 17.10 ± 1.28 <sup>a</sup>         | 15.70 ± 1.63 <sup>a</sup> | 16.51 ± 1.17 <sup>a</sup> | 15.33 ± 0.57 <sup>a</sup> | 16.62 ± 0.42 <sup>a</sup> | 11.42 ± 0.88 <sup>b</sup> |

94 <sup>a</sup> Inhibition zone diameter reflects the effect of proteases on the antibacterial activity of Salivaricin S3, as determined by agar-well diffusion assay after

95 treatment of Salivaricin S3 with various proteases for 3 and 15 h. Results are expressed as mean of triplicate values ± standard deviation. Different

96 lowercase letters mean significant ( $P < 0.05$ ) differences in a column.

97

98 Table S 16 Antibiotic susceptibility of the three LAB strains tested by the K-B method<sup>a</sup>

| Name                                                | Antibiotic susceptibility |            |            |
|-----------------------------------------------------|---------------------------|------------|------------|
|                                                     | NCUH061004                | NCUH062003 | NCUH001003 |
| <b>Group 1-Inhibitors of cell wall synthesis</b>    |                           |            |            |
| Penicillin                                          | S                         | S          | S          |
| Cephalosporin                                       | S                         | S          | S          |
| Teicoplanin                                         | S                         | S          | S          |
| <b>Group 2-Inhibitors of protein synthesis</b>      |                           |            |            |
| Aminoglycoside                                      | R                         | R          | R          |
| Tetracycline                                        | S                         | S          | S          |
| Erythromycin                                        | S                         | S          | S          |
| clindamycin                                         | S                         | S          | S          |
| <b>Group 3-Inhibitors of nucleic acid synthesis</b> |                           |            |            |
| Sulfamethoxazole                                    | R                         | R          | R          |
| Ciprofloxacin                                       | S                         | MS         | MS         |
| Norfloxacin                                         | MS                        | R          | R          |

|          |    |   |   |
|----------|----|---|---|
| Rifampin | MS | S | S |
|----------|----|---|---|

99 <sup>a</sup> Transparent anti-bacterial zone formed around the paper sheet explained according to CLSI guidelines "Implementation Standard for Antimicrobial  
100 Sensitivity Test". Results are expressed as R (resistant), MS (moderately susceptible), or S (susceptible).
